# Supplementary material for: A comprehensive analysis of the Streptococcus pyogenes and human plasma protein interaction network
Source: Royal Society of Chemistry journal article supplement (doi:10.1039/c3mb70555b), 2014-01-28
Supplement: c3mb70555b.xlsx [file c3mb70555b.xlsx]

## Sheet: S-table 1
S-Table 1. Proteins from shotgun MS results for plasma ranked by abundance, in same order as Fig. 3a. pXIC P is a measure of the percentage of total intensity,
which is relatively proportional to real abundance. P/PA is if the protein also is found in the plasma adsorption, P represents that the protein is only found in plasma,
P>PA indicates that there is a decrease from plasma to plasma adsorption and P<PA indicates an increase.
Group represents what group the protein can be found in Fig. 2 (or S-table 2), where 0 represents not measured in SRM
Nr. in table	Protein	pXIC P	P/PA	Group
1	Serum albumin precursor - Homo sapiens (Human) (sp|P02768|ALBU_HUMAN; 19284)	0,63581672	P>PA	1
2	Alpha-2-macroglobulin precursor (Alpha-2-M) - Homo sapiens (Human) (sp|P01023|A2MG_HUMAN; 392778)	0,043748154	P>PA	1
3	Ig kappa chain C region - Homo sapiens (Human) (sp|P01834|KAC_HUMAN; 356403)	0,043240344	P>PA	0
4	Ig gamma-1 chain C region - Homo sapiens (Human) (sp|P01857|IGHG1_HUMAN; 444992)	0,039260697	P<PA	0
5	Serotransferrin precursor (Transferrin) (Siderophilin) (Beta-1-metal-binding globulin) - Homo sapien (sp|P02787|TRFE_HUMAN; 388655)	0,029161439	P>PA	1
6	complement component 3 precursor [Homo sapiens] (ref|NP_000055.2|; 392824)	0,02082562	P>PA	1
7	Ig gamma-4 chain C region - Homo sapiens (Human) (sp|P01861|IGHG4_HUMAN; 8187)	0,020320593	P<PA	0
8	Alpha-1-antitrypsin precursor (Alpha-1 protease inhibitor) (Alpha-1-antiproteinase) - Homo sapiens ( (sp|P01009|A1AT_HUMAN; 8021)	0,014252481	P>PA	1
9	Ig lambda chain C regions - Homo sapiens (Human) (sp|P01842|LAC_HUMAN; 342716)	0,012577178	P>PA	0
10	Ig alpha-1 chain C region - Homo sapiens (Human) (sp|P01876|IGHA1_HUMAN; 445154)	0,009686581	P>PA	0
11	Haptoglobin precursor [Contains: Haptoglobin alpha chain; Haptoglobin beta chain] - Homo sapiens (Hu (sp|P00738|HPT_HUMAN; 444784)	0,009494636	P>PA	1
12	Apolipoprotein B-100 precursor (Apo B-100) [Contains: Apolipoprotein B-48 (Apo B-48)] - Homo sapiens (sp|P04114|APOB_HUMAN; 392798)	0,009142795	P	0
13	Apolipoprotein A-I precursor (Apo-AI) (ApoA-I) [Contains: Apolipoprotein A-I(1-242)] - Homo sapiens (sp|P02647|APOA1_HUMAN; 5182)	0,008592328	P>PA	1
14	Fibrinogen alpha chain precursor [Contains: Fibrinopeptide A] - Homo sapiens (Human) (sp|P02671|FIBA_HUMAN; 19711)	0,005940043	P<PA	5
15	Fibrinogen beta chain precursor [Contains: Fibrinopeptide B] - Homo sapiens (Human) (sp|P02675|FIBB_HUMAN; 19710)	0,005430695	P<PA	5
16	Tax_Id=9606 RecName: Full=Ig gamma-2 chain C region; (unkn|P01859|IGHG2_HUMAN; 17982015)	0,005398867	P<PA	0
17	Fibrinogen gamma chain precursor - Homo sapiens (Human) (sp|P02679|FIBG_HUMAN; 19713)	0,004712257	P<PA	5
18	Ceruloplasmin precursor (EC 1.16.3.1) (Ferroxidase) - Homo sapiens (Human) (sp|P00450|CERU_HUMAN; 392776)	0,004461916	P	0
19	Hemopexin precursor (Beta-1B-glycoprotein) - Homo sapiens (Human) (sp|P02790|HEMO_HUMAN; 3985)	0,004403604	P	0
20	Tax_Id=9606 Gene_Symbol=CFH Isoform 1 of Complement factor H precursor (unkn|IPI00029739|IPI:IPI00029739.5|SW; 17220796)	0,004318798	P<PA	5
21	Ig mu heavy chain disease protein (BOT) - Homo sapiens (Human) (sp|P04220|MUCB_HUMAN; 444989)	0,003234789	P>PA	0
22	Transthyretin precursor (Prealbumin) (TBPA) (TTR) (ATTR) - Homo sapiens (Human) (sp|P02766|TTHY_HUMAN; 11756)	0,002994272	P	0
23	Complement C4-B precursor (Basic complement C4) [Contains: Complement C4 beta chain; Complement C4-B (sp|P0C0L5|CO4B_HUMAN; 392823)	0,002942647	P>PA	1
24	Ig gamma-3 chain C region (allotype G3m(b)) - human (pir||A23511; 524049)	0,002595788	P<PA	0
25	inter-alpha globulin inhibitor H2 polypeptide [Homo sapiens] (ref|NP_002207.2|; 2690)	0,002477467	P	0
26	Plasminogen precursor (EC 3.4.21.7) [Contains: Plasmin heavy chain A; Activation peptide; Angiostati (sp|P00747|PLMN_HUMAN; 22361)	0,002190865	P>PA	1
27	1 of Ig mu chain C region OS=Homo sapiens GN=IGHM (unkn|sp|P01871-1|IGHM_HUM|Isoform; 17394026)	0,002094666	P>PA	0
28	Complement factor B precursor (EC 3.4.21.47) (C3/C5 convertase) (Properdin factor B) (Glycine-rich b (sp|P00751|CFAB_HUMAN; 428089)	0,002079354	P>PA	1
29	Vitamin D-binding protein precursor (DBP) (Group-specific component) (Gc-globulin) (VDB) - Homo sapi (sp|P02774|VTDB_HUMAN; 427313)	0,00200765	P	0
30	inter-alpha (globulin) inhibitor H4 [Homo sapiens] (ref|NP_002209.2|; 18032)	0,001986535	P>PA	0
31	Alpha-1-antichymotrypsin precursor (ACT) [Contains: Alpha-1-antichymotrypsin His-Pro-less] - Homo sa (sp|P01011|AACT_HUMAN; 514677)	0,001750526	P	0
32	Inter-alpha-trypsin inhibitor heavy chain H1 precursor (ITI heavy chain H1) (Inter-alpha-inhibitor h (sp|P19827|ITIH1_HUMAN; 18030)	0,001708464	P	0
33	Apolipoprotein A-IV precursor (Apo-AIV) (ApoA-IV) - Homo sapiens (Human) (sp|P06727|APOA4_HUMAN; 446178)	0,001675065	P	1
34	Plasma protease C1 inhibitor precursor (C1 Inh) (C1Inh) (C1 esterase inhibitor) (C1-inhibiting facto (sp|P05155|IC1_HUMAN; 4411)	0,001675015	P	0
35	Antithrombin-III precursor (ATIII) - Homo sapiens (Human) (sp|P01008|ANT3_HUMAN; 2009)	0,001526034	P	0
36	Alpha-1-acid glycoprotein 1 precursor (AGP 1) (Orosomucoid-1) (OMD 1) - Homo sapiens (Human) (sp|P02763|A1AG1_HUMAN; 392774)	0,001408245	P	0
37	Clusterin precursor (Complement-associated protein SP-40,40) (Complement cytolysis inhibitor) (CLI) (sp|P10909|CLUS_HUMAN; 23971)	0,00126276	P>PA	1
38	Alpha-1B-glycoprotein precursor (Alpha-1-B glycoprotein) - Homo sapiens (Human) (sp|P04217|A1BG_HUMAN; 392814)	0,001124288	P	0
39	Ig heavy chain V-III region BRO - Homo sapiens (Human) (sp|P01766|HV3E_HUMAN; 357310)	0,00110354	P<PA	0
40	Alpha-2-HS-glycoprotein precursor (Fetuin-A) (Alpha-2-Z-globulin) (Ba-alpha-2-glycoprotein) [Contain (sp|P02765|FETUA_HUMAN; 392812)	0,001090397	P	0
41	Ig kappa chain V-III region VG precursor (Fragment) - Homo sapiens (Human) (sp|P04433|KV3I_HUMAN; 355207)	0,001038969	P>PA	0
42	Alpha-1-acid glycoprotein 2 precursor (AGP 2) (Orosomucoid-2) (OMD 2) - Homo sapiens (Human) (sp|P19652|A1AG2_HUMAN; 25282)	0,001035907	P	0
43	Ig kappa chain V-I region AG - Homo sapiens (Human) (sp|P01593|KV1A_HUMAN; 335972)	0,001002615	P>PA	0
44	Gelsolin precursor (Actin-depolymerizing factor) (ADF) (Brevin) (AGEL) - Homo sapiens (Human) (sp|P06396|GELS_HUMAN; 25330)	0,000956225	P>PA	1
45	kininogen [Homo sapiens (gb|AAB59550.1|; 18800)	0,000952447	P	0
46	Chain , Recombinant Le (pdb|2LVE|; 337509)	0,000936582	P>PA	0
47	Ig kappa chain V-II region TEW - Homo sapiens (Human) (sp|P01617|KV2D_HUMAN; 337506)	0,000925565	P>PA	0
48	Ig kappa chain V-III region Ti - Homo sapiens (Human) (sp|P01622|KV3D_HUMAN; 337508)	0,000888185	P>PA	0
49	Fibronectin precursor (FN) (Cold-insoluble globulin) (CIG) - Homo sapiens (Human) (sp|P02751|FINC_HUMAN; 392799)	0,000834471	P<PA	4
50	Beta-2-glycoprotein 1 precursor (Beta-2-glycoprotein I) (Apolipoprotein H) (Apo-H) (B2GPI) (Beta(2)G (sp|P02749|APOH_HUMAN; 11286)	0,000828805	P>PA	1
51	Apolipoprotein E precursor (Apo-E) - Homo sapiens (Human) (sp|P02649|APOE_HUMAN; 13190)	0,000811331	P<PA	3
52	Prothrombin precursor (EC 3.4.21.5) (Coagulation factor II) [Contains: Activation peptide fragment 1 (sp|P00734|THRB_HUMAN; 392792)	0,000805928	P	0
53	AMBP protein precursor [Contains: Alpha-1-microglobulin (Protein HC) (Complex-forming glycoprotein h (sp|P02760|AMBP_HUMAN; 25278)	0,000720573	P	0
54	Ig kappa chain V-III region NG9 precursor (Fragment) - Homo sapiens (Human) (sp|P01621|KV3C_HUMAN; 336521)	0,000665546	P	0
55	Ig kappa chain V-III region HIC precursor - Homo sapiens (Human) (sp|P18136|KV3M_HUMAN; 336560)	0,000631826	P>PA	0
56	Serum paraoxonase/arylesterase 1 (PON 1) (Serum aryldialkylphosphatase 1) (A-esterase 1) (Aromatic e (sp|P27169|PON1_HUMAN; 392828)	0,000620413	P	5
57	Chain B, Hemoglobin (Deoxy) Mutant With Additional Met At The N-Terminus Of The Beta Chains (pdb|1DXT|B; 3927)	0,00059088	P>PA	1
58	Angiotensinogen precursor [Contains: Angiotensin-1 (Angiotensin I) (Ang I); Angiotensin-2 (Angiotens (sp|P01019|ANGT_HUMAN; 2480)	0,000576205	P	0
59	Vitronectin precursor (Serum-spreading factor) (S-protein) (V75) [Contains: Vitronectin V65 subunit; (sp|P04004|VTNC_HUMAN; 10553)	0,000557063	P>PA	1
60	Alpha-2-antiplasmin precursor (Alpha-2-plasmin inhibitor) (Alpha-2-PI) (Alpha-2-AP) - Homo sapiens ( (sp|P08697|A2AP_HUMAN; 10147)	0,000500167	P	0
61	Ig heavy chain V-I region Mot - Homo sapiens (Human) (sp|P06326|HV1F_HUMAN; 337458)	0,000493817	P>PA	0
62	Haptoglobin-related protein precursor - Homo sapiens (Human) (sp|P00739|HPTR_HUMAN; 444785)	0,000479614	P>PA	0
63	Apolipoprotein D precursor (Apo-D) (ApoD) - Homo sapiens (Human) (sp|P05090|APOD_HUMAN; 25779)	0,000460777	P>PA	4
64	Complement C1q subcomponent subunit B precursor - Homo sapiens (Human) (sp|P02746|C1QB_HUMAN; 485189)	0,000457609	P>PA	5
65	C4b-binding protein alpha chain precursor (C4bp) (Proline-rich protein) (PRP) - Homo sapiens (Human) (sp|P04003|C4BP_HUMAN; 2283)	0,000431757	P<PA	5
66	Histidine-rich glycoprotein precursor (Histidine-proline-rich glycoprotein) (HPRG) - Homo sapiens (H (sp|P04196|HRG_HUMAN; 18798)	0,000422628	P>PA	1
67	Zinc-alpha-2-glycoprotein precursor (Zn-alpha-2-glycoprotein) (Zn-alpha-2-GP) - Homo sapiens (Human) (sp|P25311|ZA2G_HUMAN; 471170)	0,00037072	P>PA	5
68	Complement factor H-related 1 - Homo sapiens (Human) (tr|Q5TFM6|Q5TFM6_HUMAN; 2132)	0,000353616	P<PA	0
69	complement component 5 [Homo sapiens] (ref|NP_001726.2|; 25325)	0,000347917	P<PA	4
70	Afamin precursor (Alpha-albumin) (Alpha-Alb) - Homo sapiens (Human) (sp|P43652|AFAM_HUMAN; 445299)	0,00031072	P	0
71	Chain A, Hemoglobin (Alpha + Met) Variant (pdb|1BZ1|A; 8986)	0,00031052	P>PA	1
72	Ig heavy chain V-III region TUR - Homo sapiens (Human) (sp|P01779|HV3R_HUMAN; 337449)	0,000300972	P>PA	0
73	Complement component C7 precursor - Homo sapiens (Human) (sp|P10643|CO7_HUMAN; 430541)	0,000290174	P<PA	1
74	Ig heavy chain V-III region KOL - Homo sapiens (Human) (sp|P01772|HV3K_HUMAN; 352207)	0,000276266	P<PA	0
75	Heparin cofactor 2 precursor (Heparin cofactor II) (HC-II) (Protease inhibitor leuserpin 2) (HLS2) - (sp|P05546|HEP2_HUMAN; 16891)	0,000265413	P	0
76	apolipoprotein L1 isoform a precursor [Homo sapiens (ref|NP_003652.2|; 17153)	0,000249758	P	0
77	Ig lambda chain V-III region LOI - Homo sapiens (Human) (sp|P80748|LV3B_HUMAN; 337568)	0,000247986	P>PA	0
78	Serum amyloid P-component precursor (SAP) (9.5S alpha-1-glycoprotein) [Contains: Serum amyloid P-com (sp|P02743|SAMP_HUMAN; 1810)	0,000234241	P	0
79	Ig heavy chain V-III region VH26 precursor - Homo sapiens (Human) (sp|P01764|HV3C_HUMAN; 357821)	0,000221368	P<PA	0
80	Ig lambda chain V-III region SH - Homo sapiens (Human) (sp|P01714|LV3A_HUMAN; 337553)	0,000217645	P>PA	0
81	Ig heavy chain V-III region BUT - Homo sapiens (Human) (sp|P01767|HV3F_HUMAN; 337441)	0,000207613	P<PA	0
82	CD5 antigen-like precursor (SP-alpha) (CT-2) (IgM-associated peptide) - Homo sapiens (Human) (sp|O43866|CD5L_HUMAN; 1770)	0,000199631	P>PA	0
83	complement component C6 precursor peptid (gb|AAA51860.1|; 20023)	0,000196779	P<PA	1
84	Ig lambda chain V-I region NEW - Homo sapiens (Human) (sp|P01701|LV1C_HUMAN; 337541)	0,000194303	P>PA	0
85	Ig lambda chain V-I region NEWM - Homo sapiens (Human) (sp|P01703|LV1E_HUMAN; 337543)	0,000190466	P>PA	0
86	Complement factor I precursor (EC 3.4.21.45) (C3B/C4B inactivator) [Contains: Complement factor I he (sp|P05156|CFAI_HUMAN; 412090)	0,00017372	P	0
87	Plasma retinol-binding protein precursor (PRBP) (RBP) [Contains: Plasma retinol-binding protein(1-18 (sp|P02753|RETBP_HUMAN; 3305)	0,000167968	P	0
88	Complement component C8 gamma chain precursor - Homo sapiens (Human) (sp|P07360|CO8G_HUMAN; 25710)	0,000166741	P<PA	1
89	Serum amyloid A-4 protein precursor (Constitutively expressed serum amyloid A protein) (C-SAA) - Hom (sp|P35542|SAA4_HUMAN; 352553)	0,000165729	P	0
90	Ig lambda chain V-I region WAH - Homo sapiens (Human) (sp|P04208|LV1F_HUMAN; 336564)	0,000161229	P>PA	0
91	Tax_Id=9606 RecName: Full=Complement C1r subcomponent; EC=3.4.21.41; AltName: Full=Complement compon (unkn|P00736|C1R_HUMAN; 17982011)	0,000157731	P>PA	1
92	Ig kappa chain V-III region SIE - Homo sapiens (Human) (sp|P01620|KV3B_HUMAN; 353196)	0,000148085	P	0
93	Ig kappa chain V-I region HK102 precursor (Fragment) - Homo sapiens (Human) (sp|P01602|KV1J_HUMAN; 356795)	0,000143023	P	0
94	Complement C1s subcomponent precursor (EC 3.4.21.42) (C1 esterase) [Contains: Complement C1s subcomp (sp|P09871|C1S_HUMAN; 445996)	0,00014286	P>PA	1
95	Ficolin-3 precursor (Collagen/fibrinogen domain-containing protein 3) (Collagen/fibrinogen domain-co (sp|O75636|FCN3_HUMAN; 488)	0,000142443	P	0
96	Gene_Symbol=IGHA2 Ig alpha-2 chain C region (unkn|IPI:IPI00641229.4|SW|Tax_Id=9606; 17522711)	0,000135161	P	0
97	HistoneH4 OS=Homo sapiens GN=HIST1H4A PE=1 SV=2 (sp|P62805|H4_HUMAN; 1438)	0,000134991	P	5
98	Ig heavy chain V-III region GAL - Homo sapiens (Human) (sp|P01781|HV3T_HUMAN; 337451)	0,000132762	P<PA	0
99	hypothetical protein LOC391123 [Homo sapiens] (ref|NP_001013683.1|; 487144)	0,000132755	P	0
100	Ig kappa chain V-I region Wes - Homo sapiens (Human) (sp|P01611|KV1S_HUMAN; 337501)	0,000132029	P	0
101	Immunoglobulin J chain - Homo sapiens (Human) (sp|P01591|IGJ_HUMAN; 335195)	0,000128992	P	0
102	Pigment epithelium-derived factor precursor (PEDF) (Serpin-F1) (EPC-1) - Homo sapiens (Human) (sp|P36955|PEDF_HUMAN; 388667)	0,000128594	P	0
103	Complement C2 precursor (EC 3.4.21.43) (C3/C5 convertase) [Contains: Complement C2b fragment; Comple (sp|P06681|CO2_HUMAN; 21391)	0,00012434	P	0
104	Carboxypeptidase N subunit 2 precursor (Carboxypeptidase N polypeptide 2) (Carboxypeptidase N 83 kDa (sp|P22792|CPN2_HUMAN; 448313)	0,000122853	P	0
105	Ig lambda chain V-IV region Hil - Homo sapiens (Human) (sp|P01717|LV4C_HUMAN; 337555)	0,000120108	P>PA	0
106	Leucine-rich alpha-2-glycoprotein precursor (LRG) - Homo sapiens (Human) (sp|P02750|A2GL_HUMAN; 12187)	0,000117027	P	0
107	Ig kappa chain V-I region CAR - Homo sapiens (Human) (sp|P01596|KV1D_HUMAN; 337494)	0,000116521	P>PA	0
108	Ig kappa chain V-II region RPMI 6410 precursor - Homo sapiens (Human) (sp|P06310|KV2F_HUMAN; 356804)	0,000114439	P	0
109	Complement C1q subcomponent subunit A precursor - Homo sapiens (Human) (sp|P02745|C1QA_HUMAN; 376)	0,000113603	P>PA	0
110	Histone H2B type F-S (H2B.s) (H2B/s) (sp|P57053|H2BFS_HUMAN; 16698)	0,000111436	P	3
111	Ig kappa chain V-I region Roy - Homo sapiens (Human) (sp|P01608|KV1P_HUMAN; 336519)	9.68363	P	0
112	Apolipoprotein A-II precursor (Apo-AII) (ApoA-II) [Contains: Apolipoprotein A-II(1-76)] - Homo sapie (sp|P02652|APOA2_HUMAN; 1875)	9.36141	P	1
113	Complement C1q subcomponent subunit C precursor - Homo sapiens (Human) (sp|P02747|C1QC_HUMAN; 378)	9.28593	P<PA	5
114	Vitamin K-dependent protein S precursor - Homo sapiens (Human) (sp|P07225|PROS_HUMAN; 18160)	9.25204	P<PA	3
115	Ig heavy chain V-I region V35 precursor - Homo sapiens (Human) (sp|P23083|HV1G_HUMAN; 337466)	8.42801	P>PA	0
116	Apolipoprotein(a) precursor (EC 3.4.21.-) (Apo(a)) (Lp(a)) - Homo sapiens (Human) (sp|P08519|APOA_HUMAN; 429001)	8.31187	P	0
117	Apolipoprotein M (Apo-M) (ApoM) (Protein G3a) - Homo sapiens (Human) (sp|O95445|APOM_HUMAN; 21351)	7.99994	P	0
118	Ig lambda chain V region 4A precursor - Homo sapiens (Human) (sp|P04211|LV0A_HUMAN; 356625)	7.83091	P	0
119	Inter-alpha (Globulin) inhibitor H3 - Homo sapiens (Human) (tr|Q3B7H5|Q3B7H5_HUMAN; 520729)	7.75547	P	1
120	Ig lambda chain V-I region NIG-64 - Homo sapiens (Human) (sp|P01702|LV1D_HUMAN; 337542)	7.31609	P	0
121	glycosylphosphatidylinositol specific phospholipase D1 isoform 1 precursor [Homo sapiens] (ref|NP_001494.2|; 21102)	0,00007305	P	0
122	Chain A, Crystal Structure Of Apo S100a3 (pdb|1KSO|A; 13809)	7.22672	P	0
123	Ig kappa chain V-I region BAN - Homo sapiens (Human) (sp|P04430|KV1V_HUMAN; 357326)	6.87953	P>PA	0
124	Immunoglobulin lambda-like polypeptide 1 precursor (Immunoglobulin-related protein 14.1) (Immunoglob (sp|P15814|IGLL1_HUMAN; 16948)	6.76766	P	0
125	Plasma kallikrein precursor (EC 3.4.21.34) (Plasma prekallikrein) (Kininogenin) (Fletcher factor) [C (sp|P03952|KLKB1_HUMAN; 394873)	6.65135	P	0
126	FYVE, RhoGEF and PH domain-containing protein 6 (Zinc finger FYVE domain-containing protein 24) - Ho (sp|Q6ZV73|FGD6_HUMAN; 622392)	6.47117	P	0
127	Ig kappa chain V-IV region JI precursor - Homo sapiens (Human) (sp|P06313|KV4B_HUMAN; 357329)	6.26994	P	0
128	Complement component C8 beta chain precursor (Complement component 8 subunit beta) - Homo sapiens (H (sp|P07358|CO8B_HUMAN; 392881)	6.11927	P>PA	1
129	Ig kappa chain V-I region Lay - Homo sapiens (Human) (sp|P01605|KV1M_HUMAN; 338756)	5.88742	P	0
130	Coagulation factor XII precursor (EC 3.4.21.38) (Hageman factor) (HAF) [Contains: Coagulation factor (sp|P00748|FA12_HUMAN; 450519)	5.85476	P	0
131	Ig heavy chain V-II region ARH-77 precursor - Homo sapiens (Human) (sp|P06331|HV2I_HUMAN; 337459)	5.24677	P<PA	0
132	Ig kappa chain V-II region GM607 precursor (Fragment) - Homo sapiens (Human) (sp|P06309|KV2E_HUMAN; 337515)	4.92452	P	0
133	Corticosteroid-binding globulin precursor (CBG) (Transcortin) (Serpin A6) - Homo sapiens (Human) (sp|P08185|CBG_HUMAN; 8019)	4.63785	P	0
134	Ig kappa chain V-I region DEE - Homo sapiens (Human) (sp|P01597|KV1E_HUMAN; 337495)	4.60892	P	0
135	Insulin-like growth factor-binding protein complex acid labile chain precursor (ALS) - Homo sapiens (sp|P35858|ALS_HUMAN; 9090)	4.51058	P	0
136	N-acetylmuramoyl-L-alanine amidase precursor (EC 3.5.1.28) (Peptidoglycan recognition protein long) (sp|Q96PD5|PGRP2_HUMAN; 12571)	4.46383	P	0
137	Chain A, Wat, A Variable Domain From Immunoglobulin Light-Chain (Bence-Jones Protein) (pdb|1WTL|A; 353569)	4.44869	P	0
138	Kallistatin precursor (Serpin A4) (Kallikrein inhibitor) (Protease inhibitor 4) - Homo sapiens (Huma (sp|P29622|KAIN_HUMAN; 8027)	4.40246	P	0
139	Ig kappa chain V-I region AU - Homo sapiens (Human) (sp|P01594|KV1B_HUMAN; 335973)	4.32802	P	0
140	Ig heavy chain V-I region HG3 precursor - Homo sapiens (Human) (sp|P01743|HV1B_HUMAN; 357309)	4.32113	P<PA	0
141	Ig kappa chain V-III region IARC/BL41 precursor - Homo sapiens (Human) (sp|P06311|KV3K_HUMAN; 357328)	0,000038879	P	0
142	Ig lambda chain V-I region VOR - Homo sapiens (Human) (sp|P01699|LV1A_HUMAN; 337540)	3.88528	P	0
143	Histone H2B 7 (pdb|2HIO|P0C1H5; 1437)	3.74263	P	5
144	Ig kappa chain V-III region POM - Homo sapiens (Human) (sp|P01624|KV3F_HUMAN; 336522)	3.66819	P>PA	0
145	junction plakoglobin [Homo sapiens] (ref|NP_002221.1|; 10849)	3.63068	P<PA	3
146	Attractin precursor (Mahogany homolog) (DPPT-L) - Homo sapiens (Human) (sp|O75882|ATRN_HUMAN; 15618)	3.44292	P	0
147	Ig kappa chain V-I region WEA - Homo sapiens (Human) (sp|P01610|KV1R_HUMAN; 336520)	3.29783	P	0
148	Ig heavy chain V-III region WEA - Homo sapiens (Human) (sp|P01763|HV3B_HUMAN; 340341)	3.22918	P<PA	0
149	Ig lambda chain V-II region BUR - Homo sapiens (Human) (sp|P01708|LV2E_HUMAN; 337548)	3.15238	P	0
150	Ig kappa chain V-I region EU - Homo sapiens (Human) (sp|P01598|KV1F_HUMAN; 342435)	3.03199	P>PA	0
151	Complement factor H-related protein 2 precursor (FHR-2) (H factor-like protein 2) (H factor-like 3) (sp|P36980|FHR2_HUMAN; 2135)	3.01233	P>PA	0
152	Desmoplakin (DP) (250/210 kDa paraneoplastic pemphigus antigen) - Homo sapiens (Human) (sp|P15924|DESP_HUMAN; 21008)	3.00907	P<PA	0
153	Ig kappa chain V-II region MIL - Homo sapiens (Human) (sp|P01616|KV2C_HUMAN; 337505)	3.00402	P	0
154	Actin, cytoplasmic 2 OS=Homo sapiens GN=ACTG1 PE=1 SV=1 (sp|P63261|ACTG_HUMAN; 11535)	2.71033	P<PA	2
155	Ig kappa chain V-II region Cum - Homo sapiens (Human) (sp|P01614|KV2A_HUMAN; 337503)	2.59022	P	0
156	Ig kappa chain V-III region GOL (Rheumatoid factor) - Homo sapiens (Human) (sp|P04206|KV3G_HUMAN; 357325)	2.43562	P	0
157	Ig kappa chain V-I region Walker precursor - Homo sapiens (Human) (sp|P04431|KV1W_HUMAN; 356803)	2.42341	P	0
158	Lumican precursor (Keratan sulfate proteoglycan lumican) (KSPG lumican) - Homo sapiens (Human) (sp|P51884|LUM_HUMAN; 6341)	2.42248	P	0
159	Ig kappa chain V-II region FR - Homo sapiens (Human) (sp|P01615|KV2B_HUMAN; 337504)	2.33395	P	0
160	Ventral anterior homeobox 1 - Homo sapiens (Human) (sp|Q5SQQ9|VAX1_HUMAN; 529873)	2.29018	P	0
161	Ig kappa chain V-III region VH precursor (Fragment) - Homo sapiens (Human) (sp|P04434|KV3J_HUMAN; 355208)	2.11885	P	0
162	Lysozyme C precursor (EC 3.2.1.17) (1,4-beta-N-acetylmuramidase C) - Homo sapiens (Human) (sp|P61626|LYSC_HUMAN; 6249)	0,000019827	P>PA	2
163	Cholinesterase precursor (EC 3.1.1.8) (Acylcholine acylhydrolase) (Choline esterase II) (Butyrylchol (sp|P06276|CHLE_HUMAN; 18648)	1.92754	P	0
164	Ig lambda chain V-VI region EB4 precursor - Homo sapiens (Human) (sp|P06319|LV6E_HUMAN; 337564)	1.86843	P	0
165	Ig kappa chain V-I region Scw - Homo sapiens (Human) (sp|P01609|KV1Q_HUMAN; 337500)	1.82303	P	0
166	Tax_Id=9606 Gene_Symbol=A2ML1 Alpha-2-macroglobulin-like protein 1 precursor (unkn|IPI00419215|IPI:IPI00419215.5|SW; 17379671)	1.73432	P	0
167	Chain A, Crystal Structure Of The Human Sigma Isoform Of 14-3-3 In Complex With A Mode-1 Phosphopept (pdb|1YWT|A; 474)	1.71203	P<PA	3
168	Thyroxine-binding globulin precursor (T4-binding globulin) (Serpin A7) - Homo sapiens (Human) (sp|P05543|THBG_HUMAN; 26409)	1.64581	P	0
169	Leucine-rich repeat-containing protein 15 precursor (hLib) - Homo sapiens (Human) (sp|Q8TF66|LRC15_HUMAN; 18842)	1.58847	P	0
170	coagulation factor XIII B subunit precursor [Homo sapiens] (ref|NP_001985.2|; 2137)	1.51923	P	0
171	Apolipoprotein C-IV precursor (Apo-CIV) (ApoC-IV) - Homo sapiens (Human) (sp|P55056|APOC4_HUMAN; 13192)	1.51464	P	0
172	Desmoglein-4 precursor - Homo sapiens (Human) (sp|Q86SJ6|DSG4_HUMAN; 11753)	1.50638	P	0
173	Protein S100-A8 (pdb|1MR8|P05109; 1576)	1.49827	P<PA	4
174	H2A histone family, member O [Homo sapiens] (ref|NP_003507.1|Q6FI13; 1439)	1.49698	P>PA	2
175	Tetranectin precursor (TN) (C-type lectin domain family 3 member B) (Plasminogen kringle 4-binding p (sp|P05452|TETN_HUMAN; 500344)	1.47508	P	0
176	Complement component C8 alpha chain precursor (Complement component 8 subunit alpha) - Homo sapiens (sp|P07357|CO8A_HUMAN; 943)	1.45001	P>PA	4
177	ATP-binding cassette sub-family A member 1 (ATP-binding cassette transporter 1) (ATP-binding cassett (sp|O95477|ABCA1_HUMAN; 446726)	1.44969	P	0
178	Coagulation factor V precursor (Activated protein C cofactor) [Contains: Coagulation factor V heavy (sp|P12259|FA5_HUMAN; 625010)	1.34941	P	0
179	Tubulinalpha-1B chain OS=Homo sapiens GN=TUBA1B PE=1 SV=1 (sp|P68363|TBA1B_HUMAN; 446125)	1.32793	P	0
180	ficolin 2 isoform a precursor [Homo sapiens] (ref|NP_004099.2|; 25636)	1.30857	P	0
181	Apolipoprotein C-I precursor (Apo-CI) (ApoC-I) - Homo sapiens (Human) (sp|P02654|APOC1_HUMAN; 13191)	1.24054	P	4
182	Mannose-binding protein C precursor (MBP-C) (MBP1) (Mannan-binding protein) (Mannose-binding lectin) (sp|P11226|MBL2_HUMAN; 3008)	0,000012315	P	0
183	plasma glutathione peroxidase 3 precursor [Homo sapiens] (ref|NP_002075.2|; 2133799)	1.20093	P	0
184	Ig lambda chain V-I region HA - Homo sapiens (Human) (sp|P01700|LV1B_HUMAN; 336563)	1.13263	P	0
185	Galectin-3-binding protein precursor (Lectin galactoside-binding soluble 3-binding protein) (Mac-2-b (sp|Q08380|LG3BP_HUMAN; 11485)	0.974223	P	0
186	Hepatocyte growth factor activator precursor (EC 3.4.21.-) (HGF activator) (HGFA) [Contains: Hepatoc (sp|Q04756|HGFA_HUMAN; 18979)	0.915638	P	0
187	Dermcidin precursor (Preproteolysin) [Contains: Survival-promoting peptide; DCD-1] - Homo sapiens (H (sp|P81605|DCD_HUMAN; 6047)	0.803566	P<PA	2
188	Ig heavy chain V-III region BUR - Homo sapiens (Human) (sp|P01773|HV3L_HUMAN; 337446)	0.798874	P	0
189	small proline-rich protein 1A [Homo sapiens] (ref|NP_005978.2|; 1565)	0.783897	P<PA	0
190	Caspase-14 precursor (EC 3.4.22.-) (CASP-14) [Contains: Caspase-14 subunit 1; Caspase-14 subunit 2] (sp|P31944|CASPE_HUMAN; 12554)	0.774063	P	1
191	filaggrin 2 [Homo sapiens] (ref|NP_001014364.1|; 630204)	0.766916	P<PA	1
192	Coagulation factor XIII A chain precursor (Coagulation factor XIIIa) (Protein-glutamine gamma-glutam (sp|P00488|F13A_HUMAN; 524148)	0.765441	P<PA	2
193	Ig kappa chain V-I region Ni - Homo sapiens (Human) (sp|P01613|KV1U_HUMAN; 337502)	0.764075	P	0
194	Vitamin K-dependent protein C precursor (EC 3.4.21.69) (Autoprothrombin IIA) (Anticoagulant protein (sp|P04070|PROC_HUMAN; 14710)	0.722215	P	0
195	Lipopolysaccharide-binding protein precursor (LBP) - Homo sapiens (Human) (sp|P18428|LBP_HUMAN; 16019)	0.072219	P	0
196	galectin 3 [Homo sapiens] (ref|NP_002297.2|; 7617)	0.071251	P	0
197	Carboxypeptidase N catalytic chain precursor (EC 3.4.17.3) (CPN) (Carboxypeptidase N polypeptide 1) (sp|P15169|CBPN_HUMAN; 3417)	0.670101	P	0
198	Proteoglycan-4 precursor (Lubricin) (Megakaryocyte-stimulating factor) (Superficial zone proteoglyca (sp|Q92954|PRG4_HUMAN; 2110)	0.656058	P	0
199	Protein S100-A9 (S100 calcium-binding protein A9) (Calgranulin-B) (Migration inhibitory factor-relat (sp|P06702|S10A9_HUMAN; 1574)	0.621547	P<PA	4
200	delta globin [Homo sapiens] (ref|NP_000510.1|; 353929)	0.599926	P	0
201	Small proline-rich protein 2D (SPR-2D) (Small proline-rich protein II) (SPR-II) - Homo sapiens (Huma (sp|P22532|SPR2D_HUMAN; 1568)	0.565252	P<PA	0
202	Apolipoprotein C-III precursor (Apo-CIII) (ApoC-III) - Homo sapiens (Human) (sp|P02656|APOC3_HUMAN; 5181)	0.552178	P	1
203	von Willebrand factor precursor (vWF) [Contains: von Willebrand antigen 2 (von Willebrand antigen II (sp|P04275|VWF_HUMAN; 394886)	0.541929	P	0
204	Cystatin C precursor (Neuroendocrine basic polypeptide) (Gamma-trace) (Post-gamma-globulin) - Homo s (sp|P01034|CYTC_HUMAN; 15791)	0.519095	P	0
205	Keratinocyte proline-rich protein (ref|NP_001020402.1|Q5T749; 482159)	0.516061	P<PA	0
206	Prolactin-inducible protein precursor (Secretory actin-binding protein) (SABP) (Gross cystic disease (sp|P12273|PIP_HUMAN; 23581)	0.513715	P	2
207	Salivary alpha-amylase precursor (EC 3.2.1.1) (1,4-alpha-D-glucan glucanohydrolase) - Homo sapiens ( (sp|P04745|AMYS_HUMAN; 1213)	0.497356	P	2
208	C-reactive protein precursor [Contains: C-reactive protein(1-205)] - Homo sapiens (Human) (sp|P02741|CRP_HUMAN; 1812)	0.483669	P	0
209	Hyaluronan-binding protein 2 precursor (EC 3.4.21.-) (Plasma hyaluronan-binding protein) (Hepatocyte (sp|Q14520|HABP2_HUMAN; 3573)	0.478139	P	0
210	Cysteine-rich secretory protein 3 precursor (CRISP-3) (SGP28 protein) - Homo sapiens (Human) (sp|P54108|CRIS3_HUMAN; 21754)	0.465521	P	0
211	Plasma serine protease inhibitor precursor (PCI) (Protein C inhibitor) (Serpin A5) (Plasminogen acti (sp|P05154|IPSP_HUMAN; 379415)	0.424018	P	0
212	PREDICTED: similar to glutaredoxin cysteine-rich 1 protein [Homo sapiens (ref|XP_931679.1|; 2682040)	0.417238	P	0
213	Plakophilin-1 (Band-6 protein) (B6P) - Homo sapiens (Human) (sp|Q13835|PKP1_HUMAN; 2168)	0.405894	P<PA	0
214	Sex hormone-binding globulin precursor (SHBG) (Sex steroid-binding protein) (SBP) (Testis-specific a (sp|P04278|SHBG_HUMAN; 10337)	0.364298	P	0
215	Apolipoprotein F precursor (Apo-F) (Lipid transfer inhibitor protein) (LTIP) - Homo sapiens (Human) (sp|Q13790|APOF_HUMAN; 456622)	0.351522	P	0
216	biotinidase precursor [Homo sapiens] (ref|NP_000051.1|; 17604)	0.351307	P	0
217	C4b-binding protein beta chain precursor - Homo sapiens (Human) (sp|P20851|C4BB_HUMAN; 2282)	0.034063	P<PA	5
218	Tubulinbeta-2A chain OS=Homo sapiens GN=TUBB2A PE=1 SV=1 (sp|Q13885|TBB2A_HUMAN; 20975)	0.325383	P	0
219	Extracellular matrix protein 1 precursor (Secretory component p85) - Homo sapiens (Human) (sp|Q16610|ECM1_HUMAN; 1464)	0.324371	P	0
220	Complement component C9 precursor [Contains: Complement component C9a; Complement component C9b] - H (sp|P02748|CO9_HUMAN; 20011)	0.321723	P<PA	4
221	Endothelial protein C receptor precursor (Endothelial cell protein C receptor) (Activated protein C (sp|Q9UNN8|EPCR_HUMAN; 15930)	0.314123	P	0
222	histone cluster 1, H1d [Homo sapiens] (ref|NP_005311.1|; 21150)	0.304171	P	5
223	annexin A2 isoform 2 [Homo sapiens] (ref|NP_004030.1|; 393888)	0.296923	P<PA	4
224	Phospholipid transfer protein precursor (Lipid transfer protein II) - Homo sapiens (Human) (sp|P55058|PLTP_HUMAN; 16149)	0.296874	P	0
225	galectin 7 [Homo sapiens] (ref|NP_002298.1|; 12952)	0.028558	P	0
226	Ig heavy chain V-III region JON - Homo sapiens (Human) (sp|P01780|HV3S_HUMAN; 337450)	0.276911	P<PA	0
227	Dual specificity protein phosphatase 14 (EC 3.1.3.48) (EC 3.1.3.16) (Mitogen-activated protein kinas (sp|O95147|DUS14_HUMAN; 10714)	0.264892	P	0
228	Mannan-binding lectin serine protease 2 precursor (EC 3.4.21.104) (Mannose-binding protein-associate (sp|O00187|MASP2_HUMAN; 4264443)	0.026065	P	0
229	Multimerin-2 precursor (EMILIN-3) (Elastin microfibril interface located protein 3) (Elastin microfi (sp|Q9H8L6|MMRN2_HUMAN; 448724)	0.242421	P	0
230	Late envelope protein 7 (LEP7) - Homo sapiens (Human) (tr|Q5T750|Q5T750_HUMAN; 473194)	0.237386	P<PA	1
231	Polyubiquitin-C (pdb|1UBQ|P0CG48; 110414)	0.232519	P>PA	2
232	Cystatin S precursor (Salivary acidic protein 1) (Cystatin SA-III) - Homo sapiens (Human) (sp|P01036|CYTS_HUMAN; 15792)	0.223798	P	4
233	Ig kappa chain V-IV region STH (Fragment) - Homo sapiens (Human) (sp|P83593|KV4D_HUMAN; 337517)	0.220366	P	0
234	Glyceraldehyde-3-phosphate dehydrogenase (pdb|1U8F|P04406; 5485)	0.216038	P<PA	2
235	Ig kappa chain V-I region Gal - Homo sapiens (Human) (sp|P01599|KV1G_HUMAN; 337496)	0.201861	P	0
236	Ig heavy chain V-II region WAH - Homo sapiens (Human) (sp|P01824|HV2F_HUMAN; 335958)	0.186513	P<PA	0
237	carbonic anhydrase I [Homo sapiens] (ref|NP_001729.1|P00915; 24260)	0.165237	P	0
238	Bleomycin hydrolase (EC 3.4.22.40) (BLM hydrolase) (BMH) (BH) - Homo sapiens (Human) (sp|Q13867|BLMH_HUMAN; 429212)	0.156435	P<PA	2
239	AT-hook-containing transcription factor 1 (Embryonic large molecule derived from yolk sac) - Homo sa (sp|Q8WYP5|AHTF1_HUMAN; 630725)	0.153519	P	0
240	Beta-2-microglobulin OS=Homo sapiens GN=B2M PE=1 SV=1 (sp|P61769|B2MG_HUMAN; 8437)	0.138818	P	0
241	collectin sub-family member 11 isoform a [Homo sapiens] (ref|NP_076932.1|; 13833)	0.138424	P	0
242	Ig kappa chain V-III region HAH precursor - Homo sapiens (Human) (sp|P18135|KV3L_HUMAN; 336559)	0.013106	P	0
243	Ig heavy chain V-III region CAM - Homo sapiens (Human) (sp|P01768|HV3G_HUMAN; 337442)	0.126908	P<PA	0
244	14-3-3 protein epsilon OS=Homo sapiens GN=YWHAE PE=1 SV=1 (sp|P62258|1433E_HUMAN; 10133)	0.117309	P>PA	0
245	Serpin B4 (Squamous cell carcinoma antigen 2) (SCCA-2) (Leupin) - Homo sapiens (Human) (sp|P48594|SPB4_HUMAN; 11911)	0.107951	P<PA	2
246	Neutrophil defensin 1 precursor (HNP-1) (HP-1) (HP1) (Defensin, alpha 1) [Contains: HP 1-56; Neutrop (sp|P59665|DEF1_HUMAN; 23778)	0.106899	P>PA	4
247	Glutamate dehydrogenase 1, mitochondrial precursor (EC 1.4.1.3) (GDH) - Homo sapiens (Human) (sp|P00367|DHE3_HUMAN; 3237)	0.104152	P	4
248	Heatshock-related 70 kDa protein 2 OS=Homo sapiens GN=HSPA2 PE=1 SV=1 (sp|P54652|HSP72_HUMAN; 7698)	0.102007	P	0
249	Ig heavy chain V-III region WAS - Homo sapiens (Human) (sp|P01776|HV3O_HUMAN; 337447)	0.0964973	P	0
250	Ig heavy chain V-III region GA - Homo sapiens (Human) (sp|P01769|HV3H_HUMAN; 337443)	0.0874878	P<PA	0
251	Cystatin SN precursor (Salivary cystatin SA-1) (Cystain SA-I) - Homo sapiens (Human) (sp|P01037|CYTN_HUMAN; 352403)	0.0063921	P	0
252	Hornerin - Homo sapiens (Human) (sp|Q86YZ3|HORN_HUMAN; 414089)	0.0597028	P<PA	0
253	Ig heavy chain V-III region TEI - Homo sapiens (Human) (sp|P01777|HV3P_HUMAN; 337448)	0.0561738	P	0
254	Tax_Id=9606 Gene_Symbol=GSDM1 Gasdermin (unkn|IPI00166200|IPI:IPI00166200.4|SW; 17220909)	0.0489071	P<PA	2
255	Serum amyloid A protein precursor (SAA) [Contains: Amyloid protein A (Amyloid fibril protein AA); Se (sp|P02735|SAA_HUMAN; 338870)	0.0463483	P	0
256	Angiogenin OS=Homo sapiens GN=ANG PE=1 SV=1 (sp|P03950|ANGI_HUMAN; 7281)	0.0405307	P	0
257	Insulin-like growth factor-binding protein 6 precursor (IGFBP-6) (IBP-6) (IGF-binding protein 6) - H (sp|P24592|IBP6_HUMAN; 5985)	0.0368705	P	0
258	Monocyte differentiation antigen CD14 precursor (Myeloid cell-specific leucine-rich glycoprotein) [C (sp|P08571|CD14_HUMAN; 388664)	0.0288108	P	0
259	Ig lambda chain V-V region DEL - Homo sapiens (Human) (sp|P01719|LV5A_HUMAN; 337557)	0.0278251	P	0
260	Ribonuclease 4 precursor (EC 3.1.27.-) (RNase 4) - Homo sapiens (Human) (sp|P34096|RNAS4_HUMAN; 7280)	0.0272322	P	0
261	similar to F-box only protein 2 [Homo sapiens] (ref|NP_001001414.1|; 508274)	0.0249031	P<PA	0
262	lactate dehydrogenase A [Homo sapiens] (ref|NP_005557.1|; 4125)	0.0225858	P<PA	0
263	Chain , Human Recombinant Epidermal Fatty Acid Binding Protein (pdb|1B56|; 4459)	0.00998798	P<PA	4
264	Transglutaminase 3 (E polypeptide, protein-glutamine-gamma-glutamyltransferase) - Homo sapiens (Huma (tr|Q32MM0|Q32MM0_HUMAN; 2612701)	0.00880102	P<PA	5

## Sheet: S-table 2
S-Table 2. Proteins from shotgun MS results for plasma adsorption ranked by abundance, in same order as Fig. 3b. pXIC PA is a measure of the percentage
of total intensity, which is relatively proportional to real abundance.P/PA is if the protein also is found in the plasma adsorption,
PA represents that the protein is only found in plasma adsorption, P>PA indicates that there is a decrease from plasma to plasma adsorption and P<PA
indicates an increase. Group represents what group the protein can be found in Fig. 2 (or S-table 2), where 0 represents not measured in SRM
Nr. in table	Protein	pXIC PA	P/PA	Group	Location
1	Fibrinogen gamma chain precursor - Homo sapiens (Human) (sp|P02679|FIBG_HUMAN; 19713)	0.219283	P<PA	5	Plasma
2	Fibrinogen beta chain precursor [Contains: Fibrinopeptide B] - Homo sapiens (Human) (sp|P02675|FIBB_HUMAN; 19710)	0.18328	P<PA	5	Plasma
3	Ig gamma-1 chain C region - Homo sapiens (Human) (sp|P01857|IGHG1_HUMAN; 444992)	0.178544	P<PA	0	Plasma
4	C4b-binding protein alpha chain precursor (C4bp) (Proline-rich protein) (PRP) - Homo sapiens (Human) (sp|P04003|C4BP_HUMAN; 2283)	0.10712	P<PA	5	Plasma
5	Fibrinogen alpha chain precursor [Contains: Fibrinopeptide A] - Homo sapiens (Human) (sp|P02671|FIBA_HUMAN; 19711)	0.0749008	P<PA	5	Plasma
6	Serum albumin precursor - Homo sapiens (Human) (sp|P02768|ALBU_HUMAN; 19284)	0.0570939	P>PA	1	Plasma
7	Ig gamma-4 chain C region - Homo sapiens (Human) (sp|P01861|IGHG4_HUMAN; 8187)	0.0536982	P<PA	0	Plasma
8	Tax_Id=9606 RecName: Full=Ig gamma-2 chain C region; (unkn|P01859|IGHG2_HUMAN; 17982015)	0.0201425	P<PA	0	Plasma
9	Vitamin K-dependent protein S precursor - Homo sapiens (Human) (sp|P07225|PROS_HUMAN; 18160)	0.0184957	P<PA	3	Plasma
10	Ig gamma-3 chain C region (allotype G3m(b)) - human (pir||A23511; 524049)	0.0123021	P<PA	0	Plasma
11	complement component 3 precursor [Homo sapiens] (ref|NP_000055.2|; 392824)	0.00926588	P>PA	1	Plasma
12	complement component 5 [Homo sapiens] (ref|NP_001726.2|; 25325)	0.00845802	P<PA	4	Plasma
13	Tax_Id=9606 Gene_Symbol=CFH Isoform 1 of Complement factor H precursor (unkn|IPI00029739|IPI:IPI00029739.5|SW; 17220796)	0.00635878	P<PA	5	Plasma
14	Titin (Connectin) (Rhabdomyosarcoma antigen MU-RMS-40.14 (sp|Q8WZ42|TITIN_HUMAN; 4299208)	0.00490423	PA	0	Unknown
15	Ig lambda chain C regions - Homo sapiens (Human) (sp|P01842|LAC_HUMAN; 342716)	0.00480212	P>PA	0	Ig
16	Actin, cytoplasmic 2 OS=Homo sapiens GN=ACTG1 PE=1 SV=1 (sp|P63261|ACTG_HUMAN; 11535)	0.00358582	P<PA	2	Cellular
17	C4b-binding protein beta chain precursor - Homo sapiens (Human) (sp|P20851|C4BB_HUMAN; 2282)	0.00305726	P<PA	5	Plasma
18	Ig heavy chain V-III region BRO - Homo sapiens (Human) (sp|P01766|HV3E_HUMAN; 357310)	0.00250767	P<PA	0	Ig
19	Ig kappa chain C region - Homo sapiens (Human) (sp|P01834|KAC_HUMAN; 356403)	0.00248765	P>PA	0	Ig
20	complement component C6 precursor peptid (gb|AAA51860.1|; 20023)	0.00220635	P<PA	1	Plasma
21	myosin, heavy polypeptide 9, non-muscle [Homo sapiens] (ref|NP_002464.1|P35579; 17154)	0.00211826	PA	0	Cellular
22	Ig heavy chain V-III region CAM - Homo sapiens (Human) (sp|P01768|HV3G_HUMAN; 337442)	0.00171783	P<PA	0	Ig
23	Filamin A, alpha (Actin binding protein 280) - Homo sapiens (Human) (tr|Q5HY55|Q5HY55_HUMAN; 26736)	0.00160771	PA	0	Cellular
24	Ig heavy chain V-III region BUT - Homo sapiens (Human) (sp|P01767|HV3F_HUMAN; 337441)	0.00142952	P<PA	0	Ig
25	Plasminogen precursor (EC 3.4.21.7) [Contains: Plasmin heavy chain A; Activation peptide; Angiostati (sp|P00747|PLMN_HUMAN; 22361)	0.00125434	P>PA	1	Plasma
26	Complement C4-B precursor (Basic complement C4) [Contains: Complement C4 beta chain; Complement C4-B (sp|P0C0L5|CO4B_HUMAN; 392823)	0.00118326	P>PA	1	Plasma
27	Talin-1 - Homo sapiens (Human) (sp|Q9Y490|TLN1_HUMAN; 394178)	0.00115924	PA	0	Cellular
28	Apolipoprotein E precursor (Apo-E) - Homo sapiens (Human) (sp|P02649|APOE_HUMAN; 13190)	0.0010361	P<PA	3	Plasma
29	Complement component C7 precursor - Homo sapiens (Human) (sp|P10643|CO7_HUMAN; 430541)	0.00100507	P<PA	1	Plasma
30	Fibronectin precursor (FN) (Cold-insoluble globulin) (CIG) - Homo sapiens (Human) (sp|P02751|FINC_HUMAN; 392799)	0.000999065	P<PA	4	ECM
31	Clusterin precursor (Complement-associated protein SP-40,40) (Complement cytolysis inhibitor) (CLI) (sp|P10909|CLUS_HUMAN; 23971)	0.000801855	P>PA	1	Plasma
32	Complement factor H-related 1 - Homo sapiens (Human) (tr|Q5TFM6|Q5TFM6_HUMAN; 2132)	0.000765816	P<PA	0	Plasma
33	vinculin isoform meta-VCL [Homo sapiens] (ref|NP_054706.1|; 3171)	0.000724773	PA	0	Cellular
34	Desmoplakin (DP) (250/210 kDa paraneoplastic pemphigus antigen) - Homo sapiens (Human) (sp|P15924|DESP_HUMAN; 21008)	0.000591631	P<PA	0	Cell adhesion
35	Complement component C8 gamma chain precursor - Homo sapiens (Human) (sp|P07360|CO8G_HUMAN; 25710)	0.000589629	P<PA	1	Plasma
36	Thrombospondin-1 precursor - Homo sapiens (Human) (sp|P07996|TSP1_HUMAN; 394117)	0.000584623	PA	0	Cell adhesion
37	Ig heavy chain V-III region VH26 precursor - Homo sapiens (Human) (sp|P01764|HV3C_HUMAN; 357821)	0.000567605	P<PA	0	Ig
38	Ig heavy chain V-III region GAL - Homo sapiens (Human) (sp|P01781|HV3T_HUMAN; 337451)	0.000548585	P<PA	0	Ig
39	Ig heavy chain V-III region KOL - Homo sapiens (Human) (sp|P01772|HV3K_HUMAN; 352207)	0.000485518	P<PA	0	Ig
40	Ig heavy chain V-I region Mot - Homo sapiens (Human) (sp|P06326|HV1F_HUMAN; 337458)	0.000461492	P>PA	0	Ig
41	Alpha-actinin-1 (Alpha-actinin cytoskeletal isoform) (Non-muscle alpha-actinin-1) (F-actin cross-lin (sp|P12814|ACTN1_HUMAN; 7743)	0.000449479	PA	5	Cellular
42	Actin, alpha skeletal muscle OS=Homo sapiens GN=ACTA1 PE=1 SV=1 (sp|P68133|ACTS_HUMAN; 2471)	0.000420448	PA	4	Cellular
43	junction plakoglobin [Homo sapiens] (ref|NP_002221.1|; 10849)	0.000405432	P<PA	3	Cell adhesion
44	Hornerin - Homo sapiens (Human) (sp|Q86YZ3|HORN_HUMAN; 414089)	0.000393419	P<PA	0	Cell adhesion
45	Keratinocyte proline-rich protein (ref|NP_001020402.1|Q5T749; 482159)	0.000388414	P<PA	0	Cell adhesion
46	Protein S100-A9 (S100 calcium-binding protein A9) (Calgranulin-B) (Migration inhibitory factor-relat (sp|P06702|S10A9_HUMAN; 1574)	0.000374399	P<PA	4	Secreted
47	Ig heavy chain V-I region HG3 precursor - Homo sapiens (Human) (sp|P01743|HV1B_HUMAN; 357309)	0.000373398	P<PA	0	Ig
48	Ig heavy chain V-II region ARH-77 precursor - Homo sapiens (Human) (sp|P06331|HV2I_HUMAN; 337459)	0.000341364	P<PA	0	Ig
49	Properdin precursor (Factor P) - Homo sapiens (Human) (sp|P27918|PROP_HUMAN; 26068)	0.000325347	PA	3	Plasma
50	Ig heavy chain V-III region TUR - Homo sapiens (Human) (sp|P01779|HV3R_HUMAN; 337449)	0.000288307	P>PA	0	Ig
51	Desmoglein-1 precursor (Desmosomal glycoprotein 1) (DG1) (DGI) (Pemphigus foliaceus antigen) - Homo (sp|Q02413|DSG1_HUMAN; 394760)	0.000217232	PA	5	Cell adhesion
52	Ig lambda chain V-III region LOI - Homo sapiens (Human) (sp|P80748|LV3B_HUMAN; 337568)	0.000180192	P>PA	0	Ig
53	Protein S100-A8 (pdb|1MR8|P05109; 1576)	0.000163174	P<PA	4	Secreted
54	tropomyosin 4 [Homo sapiens] (ref|NP_003281.1|; 12588)	0.000139148	PA	0	Cellular
55	14-3-3 protein zeta/delta (pdb|1A38|P63103; 24352)	0.000138147	PA	0	Cellular
56	Ig mu heavy chain disease protein (BOT) - Homo sapiens (Human) (sp|P04220|MUCB_HUMAN; 444989)	0.000136145	P>PA	0	Ig
57	Glyceraldehyde-3-phosphate dehydrogenase (pdb|1U8F|P04406; 5485)	0.000134143	P<PA	2	Cellular
58	Complement C1q subcomponent subunit B precursor - Homo sapiens (Human) (sp|P02746|C1QB_HUMAN; 485189)	0.000134143	P>PA	5	Plasma
59	Coagulation factor XIII A chain precursor (Coagulation factor XIIIa) (Protein-glutamine gamma-glutam (sp|P00488|F13A_HUMAN; 524148)	0.000129138	P<PA	2	Plasma
60	Complement component C9 precursor [Contains: Complement component C9a; Complement component C9b] - H (sp|P02748|CO9_HUMAN; 20011)	0.000125133	P<PA	4	Plasma
61	Complement C1q subcomponent subunit C precursor - Homo sapiens (Human) (sp|P02747|C1QC_HUMAN; 378)	0.000121129	P<PA	5	Plasma
62	Chain , Recombinant Le (pdb|2LVE|; 337509)	0.000121129	P>PA	0	Unknown
63	Ig lambda chain V-III region SH - Homo sapiens (Human) (sp|P01714|LV3A_HUMAN; 337553)	0.000120128	P>PA	0	Ig
64	filaggrin 2 [Homo sapiens] (ref|NP_001014364.1|; 630204)	0.000116124	P<PA	1	Secreted
65	Pleckstrin (Platelet p47 protein) - Homo sapiens (Human) (sp|P08567|PLEK_HUMAN; 1598337)	0.00010311	PA	0	Cellular
66	Ig heavy chain V-III region WEA - Homo sapiens (Human) (sp|P01763|HV3B_HUMAN; 340341)	9.77042e-05	P<PA	0	Ig
67	Serotransferrin precursor (Transferrin) (Siderophilin) (Beta-1-metal-binding globulin) - Homo sapien (sp|P02787|TRFE_HUMAN; 388655)	9.6603e-05	P>PA	1	Plasma
68	Fructose-bisphosphate aldolase A (ref|NP_000025.1|P04075; 9521)	9.17979e-05	PA	2	Cellular
69	Complement C1q subcomponent subunit A precursor - Homo sapiens (Human) (sp|P02745|C1QA_HUMAN; 376)	8.9095e-05	P>PA	0	Plasma
70	Ig heavy chain V-I region V35 precursor - Homo sapiens (Human) (sp|P23083|HV1G_HUMAN; 337466)	7.89842e-05	P>PA	0	Ig
71	Vitronectin precursor (Serum-spreading factor) (S-protein) (V75) [Contains: Vitronectin V65 subunit; (sp|P04004|VTNC_HUMAN; 10553)	7.47797e-05	P>PA	1	ECM
72	Gelsolin precursor (Actin-depolymerizing factor) (ADF) (Brevin) (AGEL) - Homo sapiens (Human) (sp|P06396|GELS_HUMAN; 25330)	6.94741e-05	P>PA	1	Cellular
73	Ig lambda chain V-I region WAH - Homo sapiens (Human) (sp|P04208|LV1F_HUMAN; 336564)	6.55699e-05	P>PA	0	Ig
74	Beta-2-glycoprotein 1 precursor (Beta-2-glycoprotein I) (Apolipoprotein H) (Apo-H) (B2GPI) (Beta(2)G (sp|P02749|APOH_HUMAN; 11286)	5.92632e-05	P>PA	1	Plasma
75	Ig alpha-1 chain C region - Homo sapiens (Human) (sp|P01876|IGHA1_HUMAN; 445154)	5.63601e-05	P>PA	0	Ig
76	small proline-rich protein 1A [Homo sapiens] (ref|NP_005978.2|; 1565)	5.48585e-05	P<PA	0	Cell adhesion
77	Dermcidin precursor (Preproteolysin) [Contains: Survival-promoting peptide; DCD-1] - Homo sapiens (H (sp|P81605|DCD_HUMAN; 6047)	4.93526e-05	P<PA	2	Cell adhesion
78	Protease, serine, 3 (Mesotrypsin) - Homo sapiens (Human) (tr|Q5VXV0|Q5VXV0_HUMAN; 24814)	4.68499e-05	PA	3	Secreted
79	Unc-112-related protein 2 (Kindlin-3) (MIG2-like) - Homo sapiens (Human) (sp|Q86UX7|URP2_HUMAN; 4603)	4.60491e-05	PA	0	Cell adhesion
80	annexin A2 isoform 2 [Homo sapiens] (ref|NP_004030.1|; 393888)	4.38467e-05	P<PA	4	Cellular
81	lactate dehydrogenase B [Homo sapiens] (ref|NP_002291.1|P07195; 5712)	4.2245e-05	PA	0	Cellular
82	Ig kappa chain V-III region HIC precursor - Homo sapiens (Human) (sp|P18136|KV3M_HUMAN; 336560)	4.16444e-05	P>PA	0	Ig
83	Ig kappa chain V-III region Ti - Homo sapiens (Human) (sp|P01622|KV3D_HUMAN; 337508)	3.92418e-05	P>PA	0	Ig
84	Ig heavy chain V-III region JON - Homo sapiens (Human) (sp|P01780|HV3S_HUMAN; 337450)	3.77402e-05	P<PA	0	Ig
85	desmocollin 1 isoform Dsc1a preproprotein [Homo sapiens] (ref|NP_077739.1|; 11751)	3.53377e-05	PA	0	Cell adhesion
86	SPARC precursor (Secreted protein acidic and rich in cysteine) (Osteonectin) (ON) (Basement-membrane (sp|P09486|SPRC_HUMAN; 20704)	3.40363e-05	PA	0	Cell adhesion
87	Ras-related protein Rap-1b OS=Homo sapiens GN=RAP1B PE=1 SV=1 (sp|P61224|RAP1B_HUMAN; 6232)	3.39362e-05	PA	0	Cellular
88	Serpin B12 - Homo sapiens (Human) (sp|Q96P63|SPB12_HUMAN; 11908)	3.21343e-05	PA	1	Secreted
89	Small proline-rich protein 2D (SPR-2D) (Small proline-rich protein II) (SPR-II) - Homo sapiens (Huma (sp|P22532|SPR2D_HUMAN; 1568)	3.13334e-05	P<PA	0	Cell adhesion
90	Ig kappa chain V-I region AG - Homo sapiens (Human) (sp|P01593|KV1A_HUMAN; 335972)	3.04324e-05	P>PA	0	Ig
91	Ig kappa chain V-III region VG precursor (Fragment) - Homo sapiens (Human) (sp|P04433|KV3I_HUMAN; 355207)	3.03323e-05	P>PA	0	Ig
92	Plakophilin-1 (Band-6 protein) (B6P) - Homo sapiens (Human) (sp|Q13835|PKP1_HUMAN; 2168)	3.01321e-05	P<PA	0	Cell adhesion
93	Chain A, Crystal Structure Of The Human Sigma Isoform Of 14-3-3 In Complex With A Mode-1 Phosphopept (pdb|1YWT|A; 474)	2.52269e-05	P<PA	3	Cellular
94	LIM and senescent cell antigen-like domains 1 [Homo sapiens] (ref|NP_004978.2|; 14589)	2.49266e-05	PA	0	Cellular
95	Late envelope protein 7 (LEP7) - Homo sapiens (Human) (tr|Q5T750|Q5T750_HUMAN; 473194)	2.41257e-05	P<PA	1	Cell adhesion
96	Ig kappa chain V-III region POM - Homo sapiens (Human) (sp|P01624|KV3F_HUMAN; 336522)	2.3425e-05	P>PA	0	Ig
97	Ig lambda chain V-I region NEWM - Homo sapiens (Human) (sp|P01703|LV1E_HUMAN; 337543)	2.33249e-05	P>PA	0	Ig
98	lactate dehydrogenase A [Homo sapiens] (ref|NP_005557.1|; 4125)	2.27242e-05	P<PA	0	Cellular
99	Ig lambda chain V-IV region Hil - Homo sapiens (Human) (sp|P01717|LV4C_HUMAN; 337555)	2.27242e-05	P>PA	0	Ig
100	Zinc finger CCHC domain-containing protein 11 - Homo sapiens (Human) (sp|Q5TAX3|ZCH11_HUMAN; 447051)	2.03217e-05	PA	0	Cellular
101	Filamin-B (FLN-B) (Beta-filamin) (Actin-binding-like protein) (Thyroid autoantigen) (Truncated actin (sp|O75369|FLNB_HUMAN; 394858)	1.81193e-05	PA	3	Cellular
102	Haptoglobin precursor [Contains: Haptoglobin alpha chain; Haptoglobin beta chain] - Homo sapiens (Hu (sp|P00738|HPT_HUMAN; 444784)	1.80192e-05	P>PA	1	Plasma
103	1 of Ig mu chain C region OS=Homo sapiens GN=IGHM (unkn|sp|P01871-1|IGHM_HUM|Isoform; 17394026)	1.77189e-05	P>PA	0	Ig
104	Tax_Id=9606 RecName: Full=Complement C1r subcomponent; EC=3.4.21.41; AltName: Full=Complement compon (unkn|P00736|C1R_HUMAN; 17982011)	1.76188e-05	P>PA	1	Plasma
105	chloride intracellular channel 1 [Homo sapiens] (ref|NP_001279.2|; 21371)	1.55165e-05	PA	0	Cellular
106	similar to F-box only protein 2 [Homo sapiens] (ref|NP_001001414.1|; 508274)	1.51161e-05	P<PA	0	unknown
107	Beta-parvin (Affixin) - Homo sapiens (Human) (sp|Q9HBI1|PARVB_HUMAN; 17369)	1.44154e-05	PA	0	Cellular
108	Tropomyosin alpha-3 chain (Tropomyosin-3) (Tropomyosin gamma) (hTM5) - Homo sapiens (Human) (sp|P06753|TPM3_HUMAN; 509911)	1.42152e-05	PA	3	Cellular
109	Bone morphogenetic protein 1 precursor (EC 3.4.24.19) (BMP-1) (Procollagen C-proteinase) (PCP) (Mamm (sp|P13497|BMP1_HUMAN; 23905)	1.38147e-05	PA	5	Secreted
110	Lysozyme C precursor (EC 3.2.1.17) (1,4-beta-N-acetylmuramidase C) - Homo sapiens (Human) (sp|P61626|LYSC_HUMAN; 6249)	1.26134e-05	P>PA	2	Secreted
111	Complement component C8 beta chain precursor (Complement component 8 subunit beta) - Homo sapiens (H (sp|P07358|CO8B_HUMAN; 392881)	1.11118e-05	P>PA	1	Plasma
112	Chain A, Crystal Structure Of Human Arginase I From Twinned Crystal (pdb|1WVA|A; 22139)	1.0311e-05	PA	0	Cellular
113	Histidine-rich glycoprotein precursor (Histidine-proline-rich glycoprotein) (HPRG) - Homo sapiens (H (sp|P04196|HRG_HUMAN; 18798)	9.98064e-06	P>PA	1	plasma
114	Chain B, Hemoglobin (Deoxy) Mutant With Additional Met At The N-Terminus Of The Beta Chains (pdb|1DXT|B; 3927)	9.12973e-06	P>PA	1	Plasma
115	Ig heavy chain V-III region GA - Homo sapiens (Human) (sp|P01769|HV3H_HUMAN; 337443)	9.07968e-06	P<PA	0	Ig
116	Ig kappa chain V-II region TEW - Homo sapiens (Human) (sp|P01617|KV2D_HUMAN; 337506)	8.80939e-06	P>PA	0	Ig
117	Chain , Human Recombinant Epidermal Fatty Acid Binding Protein (pdb|1B56|; 4459)	8.75934e-06	P<PA	4	Cellular
118	Cathepsin D precursor (EC 3.4.23.5) [Contains: Cathepsin D light chain; Cathepsin D heavy chain] - H (sp|P07339|CATD_HUMAN; 3840)	7.96849e-06	PA	4	Secreted
119	Complement component C8 alpha chain precursor (Complement component 8 subunit alpha) - Homo sapiens (sp|P07357|CO8A_HUMAN; 943)	7.94847e-06	P>PA	4	Plasma
120	Peroxiredoxin-1 (EC 1.11.1.15) (Thioredoxin peroxidase 2) (Thioredoxin-dependent peroxide reductase (sp|Q06830|PRDX1_HUMAN; 807)	7.85838e-06	PA	2	Cellular
121	Leukocyte elastase inhibitor (LEI) (Serpin B1) (Monocyte/neutrophil elastase inhibitor) (M/NEI) (EI) (sp|P30740|ILEU_HUMAN; 20964)	7.33782e-06	PA	0	Secreted
122	Bleomycin hydrolase (EC 3.4.22.40) (BLM hydrolase) (BMH) (BH) - Homo sapiens (Human) (sp|Q13867|BLMH_HUMAN; 429212)	6.68713e-06	P<PA	2	Secreted
123	Histidine ammonia-lyase (EC 4.3.1.3) (Histidase) - Homo sapiens (Human) (sp|P42357|HUTH_HUMAN; 6377)	6.54698e-06	PA	0	Cellular
124	Actin, cytoplasmic 1 OS=Homo sapiens GN=ACTB PE=1 SV=1 (sp|P60709|ACTB_HUMAN; 22499)	6.11652e-06	PA	0	Cellular
125	Ig lambda chain V-I region NEW - Homo sapiens (Human) (sp|P01701|LV1C_HUMAN; 337541)	5.93633e-06	P>PA	0	Ig
126	Zinc-alpha-2-glycoprotein precursor (Zn-alpha-2-glycoprotein) (Zn-alpha-2-GP) - Homo sapiens (Human) (sp|P25311|ZA2G_HUMAN; 471170)	5.63601e-06	P>PA	5	Plasma
127	Ig heavy chain V-II region WAH - Homo sapiens (Human) (sp|P01824|HV2F_HUMAN; 335958)	5.51588e-06	P<PA	0	Ig
128	Purine nucleoside phosphorylase (EC 2.4.2.1) (Inosine phosphorylase) (PNP) - Homo sapiens (Human) (sp|P00491|PNPH_HUMAN; 7275)	5.47584e-06	PA	0	Cellular
129	Heat-shock protein beta-1 (HspB1) (Heat shock 27 kDa protein) (HSP 27) (Stress-responsive protein 27 (sp|P04792|HSPB1_HUMAN; 22983)	5.29565e-06	PA	5	Cellular
130	Tax_Id=9606 RecName: Full=Latent-transforming growth factor beta-binding protein 1; Short=LTBP-1; Al (unkn|Q14766|LTBP1_HUMAN; 17982017)	5.28563e-06	PA	0	ECM
131	Corneodesmosin precursor (S protein) - Homo sapiens (Human) (sp|Q15517|CDSN_HUMAN; 21316)	5.26561e-06	PA	3	Cell adhesion
132	Thioredoxin (pdb|1ERT|P10599; 25227)	5.22557e-06	PA	3	Cellular
133	Filaggrin - Homo sapiens (Human) (sp|P20930|FILA_HUMAN; 506597)	5.21556e-06	PA	2	Cell adhesion
134	Serpin B3 (Squamous cell carcinoma antigen 1) (SCCA-1) (Protein T4-A) - Homo sapiens (Human) (sp|P29508|SPB3_HUMAN; 11913)	5.13547e-06	PA	4	Secreted
135	Elongationfactor 1-alpha 1 OS=Homo sapiens GN=EEF1A1 PE=1 SV=1 (sp|P68104|EF1A1_HUMAN; 21859)	4.84516e-06	PA	2	Cellular
136	Protein-glutamine gamma-glutamyltransferase K (EC 2.3.2.13) (Transglutaminase K) (TGase K) (TGK) (TG (sp|P22735|TGM1_HUMAN; 7430)	4.80512e-06	PA	0	Cell adhesion
137	Secreted phosphoprotein 24 precursor (Spp-24) (Secreted phosphoprotein 2) - Homo sapiens (Human) (sp|Q13103|SPP24_HUMAN; 15425)	4.01428e-06	PA	0	Plasma
138	Complement C1s subcomponent precursor (EC 3.4.21.42) (C1 esterase) [Contains: Complement C1s subcomp (sp|P09871|C1S_HUMAN; 445996)	4.00427e-06	P>PA	1	Plasma
139	ras suppressor protein 1 isoform 1 [Homo sapiens] (ref|NP_036557.1|; 2747)	3.97424e-06	PA	3	Cellular
140	Chain A, Glutathione Transferase From Homo Sapiens (pdb|1EEM|A; 3534)	3.8441e-06	PA	2	Cellular
141	Serpin B4 (Squamous cell carcinoma antigen 2) (SCCA-2) (Leupin) - Homo sapiens (Human) (sp|P48594|SPB4_HUMAN; 11911)	3.80406e-06	P<PA	2	Secreted
142	Superoxide dismutase [Mn], mitochondrial precursor (EC 1.15.1.1) - Homo sapiens (Human) (sp|P04179|SODM_HUMAN; 394788)	3.18339e-06	PA	1	Cellular
143	actin related protein 2/3 complex subunit 1B [Homo sapiens] (ref|NP_005711.1|; 23132)	3.11332e-06	PA	0	Cellular
144	F-actin capping protein alpha-1 subunit [Homo sapiens] (ref|NP_006126.1|; 427303)	3.0032e-06	PA	0	Cellular
145	Transforming growth factor beta-1 precursor (TGF-beta-1) [Contains: Latency-associated peptide (LAP) (sp|P01137|TGFB1_HUMAN; 504619)	2.95315e-06	PA	0	ECM
146	Alpha-2-macroglobulin precursor (Alpha-2-M) - Homo sapiens (Human) (sp|P01023|A2MG_HUMAN; 392778)	2.93313e-06	P>PA	1	Plasma
147	HistoneH4 OS=Homo sapiens GN=HIST1H4A PE=1 SV=2 (sp|P62805|H4_HUMAN; 1438)	2.79298e-06	P>PA	5	Cellular
148	Ig kappa chain V-I region CAR - Homo sapiens (Human) (sp|P01596|KV1D_HUMAN; 337494)	2.47264e-06	P>PA	0	Ig
149	Haptoglobin-related protein precursor - Homo sapiens (Human) (sp|P00739|HPTR_HUMAN; 444785)	2.05219e-06	P>PA	0	Plasma
150	Polyubiquitin-C (pdb|1UBQ|P0CG48; 110414)	2.01214e-06	P>PA	2	Cellular
151	Apolipoprotein D precursor (Apo-D) (ApoD) - Homo sapiens (Human) (sp|P05090|APOD_HUMAN; 25779)	1.68179e-06	P>PA	4	Plasma
152	Ig kappa chain V-I region EU - Homo sapiens (Human) (sp|P01598|KV1F_HUMAN; 342435)	1.64175e-06	P>PA	0	Ig
153	Chain B, Crystal Structure Of Arp23 COMPLEX (pdb|1K8K|B; 393918)	1.61172e-06	PA	0	Cellular
154	zinc finger protein 75 [Homo sapiens] (ref|NP_009062.2|; 26585)	1.35144e-06	PA	0	Cellular
155	Transglutaminase 3 (E polypeptide, protein-glutamine-gamma-glutamyltransferase) - Homo sapiens (Huma (tr|Q32MM0|Q32MM0_HUMAN; 2612701)	1.3114e-06	P<PA	5	Cellular
156	Ig kappa chain V-I region BAN - Homo sapiens (Human) (sp|P04430|KV1V_HUMAN; 357326)	1.28137e-06	P>PA	0	Ig
157	CD5 antigen-like precursor (SP-alpha) (CT-2) (IgM-associated peptide) - Homo sapiens (Human) (sp|O43866|CD5L_HUMAN; 1770)	1.27136e-06	P>PA	0	Cellular
158	inter-alpha (globulin) inhibitor H4 [Homo sapiens] (ref|NP_002209.2|; 18032)	1.26134e-06	P>PA	0	Plasma
159	Metalloproteinase inhibitor 1 precursor (TIMP-1) (Erythroid potentiating activity) (EPA) (Tissue inh (sp|P01033|TIMP1_HUMAN; 26067)	1.25133e-06	PA	1	Secreted
160	14-3-3 protein epsilon OS=Homo sapiens GN=YWHAE PE=1 SV=1 (sp|P62258|1433E_HUMAN; 10133)	1.09116e-06	P>PA	0	Cellular
161	Complement factor B precursor (EC 3.4.21.47) (C3/C5 convertase) (Properdin factor B) (Glycine-rich b (sp|P00751|CFAB_HUMAN; 428089)	1.05112e-06	P>PA	1	Plasma
162	Adenylyl cyclase-associated protein 1 (CAP 1 (sp|Q01518|CAP1_HUMAN; 4225627)	9.77042e-07	PA	0	Cellular
163	Neutrophil defensin 1 precursor (HNP-1) (HP-1) (HP1) (Defensin, alpha 1) [Contains: HP 1-56; Neutrop (sp|P59665|DEF1_HUMAN; 23778)	9.75039e-07	P>PA	4	Secreted
164	Complement factor H-related protein 2 precursor (FHR-2) (H factor-like protein 2) (H factor-like 3) (sp|P36980|FHR2_HUMAN; 2135)	9.72036e-07	P>PA	0	Plasma
165	annexin I [Homo sapiens] (ref|NP_000691.1|; 24988)	9.32995e-07	PA	1	Cellular
166	chloride intracellular channel 4 [Homo sapiens] (ref|NP_039234.1|; 417)	8.92952e-07	PA	2	Cellular
167	F-actin capping protein subunit beta (CapZ beta) (sp|P47756|CAPZB_HUMAN; 468101)	8.03857e-07	PA	0	Cellular
168	Alpha-1-antitrypsin precursor (Alpha-1 protease inhibitor) (Alpha-1-antiproteinase) - Homo sapiens ( (sp|P01009|A1AT_HUMAN; 8021)	7.79831e-07	P>PA	1	Plasma
169	Apolipoprotein A-I precursor (Apo-AI) (ApoA-I) [Contains: Apolipoprotein A-I(1-242)] - Homo sapiens (sp|P02647|APOA1_HUMAN; 5182)	7.43793e-07	P>PA	1	Plasma
170	Actin-related protein 2/3 complex subunit 2 (ARP2/3 complex 34 kDa subunit) (p34-ARC) - Homo sapiens (sp|O15144|ARPC2_HUMAN; 15237)	6.68713e-07	PA	3	Cellular
171	Desmocollin-3 precursor (Desmocollin-4) (HT-CP) - Homo sapiens (Human) (sp|Q14574|DSC3_HUMAN; 11747)	6.34677e-07	PA	2	Cell adhesion
172	triosephosphate isomerase 1 [Homo sapiens] (ref|NP_000356.1|; 5513)	5.97637e-07	PA	4	Cellular
173	Tax_Id=9606 Gene_Symbol=GSDM1 Gasdermin (unkn|IPI00166200|IPI:IPI00166200.4|SW; 17220909)	5.55592e-07	P<PA	2	Cellular
174	peroxiredoxin 2 isoform a [Homo sapiens] (ref|NP_005800.3|; 12472)	5.17552e-07	PA	4	Cellular
175	Nucleosome assembly protein 1-like 1 (NAP-1-related protein) (hNRP) - Homo sapiens (Human) (sp|P55209|NP1L1_HUMAN; 6294)	4.89522e-07	PA	0	Cellular
176	14-3-3 protein gamma OS=Homo sapiens GN=YWHAG PE=1 SV=2 (sp|P61981|1433G_HUMAN; 22984)	3.23345e-07	PA	2	Unknown
177	Chain A, Hemoglobin (Alpha + Met) Variant (pdb|1BZ1|A; 8986)	2.90309e-07	P>PA	1	Plasma
178	Late cornified envelope protein 1C (Late envelope protein 3) - Homo sapiens (Human) (sp|Q5T751|LCE1C_HUMAN; 1559)	2.87306e-07	PA	0	Cell adhesion
179	cytosolic malate dehydrogenase [Homo sapiens] (ref|NP_005908.1|P40925; 14214)	2.00213e-07	PA	0	Cellular
180	espin [Homo sapiens] (ref|NP_113663.2|; 437864)	1.70181e-07	PA	0	Cellular
181	enolase 1 [Homo sapiens] (ref|NP_001419.1|; 160)	2.76295e-08	PA	2	Cellular

## Sheet: S-table 3
S-Table 3. The proteins sorted in the order found in figure 1 and the adsorption ration value that were analysed by shotgun MS.
Protein	Adsorption ratio (PA/(P+PA))
Filaggrin - Homo sapiens (Human) (sp|P20930|FILA_HUMAN; 506597)	1
Protease, serine, 3 (Mesotrypsin) - Homo sapiens (Human) (tr|Q5VXV0|Q5VXV0_HUMAN; 24814)	1
desmocollin 1 isoform Dsc1a preproprotein [Homo sapiens] (ref|NP_077739.1|; 11751)	1
Serpin B12 - Homo sapiens (Human) (sp|Q96P63|SPB12_HUMAN; 11908)	1
Thioredoxin (pdb|1ERT|P10599; 25227)	1
Chain A, Crystal Structure Of Human Arginase I From Twinned Crystal (pdb|1WVA|A; 22139)	1
Desmoglein-1 precursor (Desmosomal glycoprotein 1) (DG1) (DGI) (Pemphigus foliaceus antigen) - Homo (sp|Q02413|DSG1_HUMAN; 394760)	1
F-actin capping protein subunit beta (CapZ beta) (sp|P47756|CAPZB_HUMAN; 468101)	1
Peroxiredoxin-1 (EC 1.11.1.15) (Thioredoxin peroxidase 2) (Thioredoxin-dependent peroxide reductase (sp|Q06830|PRDX1_HUMAN; 807)	1
annexin I [Homo sapiens] (ref|NP_000691.1|; 24988)	1
Serpin B3 (Squamous cell carcinoma antigen 1) (SCCA-1) (Protein T4-A) - Homo sapiens (Human) (sp|P29508|SPB3_HUMAN; 11913)	1
14-3-3 protein zeta/delta (pdb|1A38|P63103; 24352)	1
Actin, cytoplasmic 1 OS=Homo sapiens GN=ACTB PE=1 SV=1 (sp|P60709|ACTB_HUMAN; 22499)	1
Actin-related protein 2/3 complex subunit 2 (ARP2/3 complex 34 kDa subunit) (p34-ARC) - Homo sapiens (sp|O15144|ARPC2_HUMAN; 15237)	1
Adenylyl cyclase-associated protein 1 (CAP 1 (sp|Q01518|CAP1_HUMAN; 4225627)	1
Cathepsin D precursor (EC 3.4.23.5) [Contains: Cathepsin D light chain; Cathepsin D heavy chain] - H (sp|P07339|CATD_HUMAN; 3840)	1
Chain A, Glutathione Transferase From Homo Sapiens (pdb|1EEM|A; 3534)	1
Actin, alpha skeletal muscle OS=Homo sapiens GN=ACTA1 PE=1 SV=1 (sp|P68133|ACTS_HUMAN; 2471)	1
Chain B, Crystal Structure Of Arp23 COMPLEX (pdb|1K8K|B; 393918)	1
chloride intracellular channel 1 [Homo sapiens] (ref|NP_001279.2|; 21371)	1
cytosolic malate dehydrogenase [Homo sapiens] (ref|NP_005908.1|P40925; 14214)	1
enolase 1 [Homo sapiens] (ref|NP_001419.1|; 160)	1
F-actin capping protein alpha-1 subunit [Homo sapiens] (ref|NP_006126.1|; 427303)	1
Fructose-bisphosphate aldolase A (ref|NP_000025.1|P04075; 9521)	1
Heat-shock protein beta-1 (HspB1) (Heat shock 27 kDa protein) (HSP 27) (Stress-responsive protein 27 (sp|P04792|HSPB1_HUMAN; 22983)	1
Histidine ammonia-lyase (EC 4.3.1.3) (Histidase) - Homo sapiens (Human) (sp|P42357|HUTH_HUMAN; 6377)	1
lactate dehydrogenase B [Homo sapiens] (ref|NP_002291.1|P07195; 5712)	1
Leukocyte elastase inhibitor (LEI) (Serpin B1) (Monocyte/neutrophil elastase inhibitor) (M/NEI) (EI) (sp|P30740|ILEU_HUMAN; 20964)	1
Metalloproteinase inhibitor 1 precursor (TIMP-1) (Erythroid potentiating activity) (EPA) (Tissue inh (sp|P01033|TIMP1_HUMAN; 26067)	1
peroxiredoxin 2 isoform a [Homo sapiens] (ref|NP_005800.3|; 12472)	1
Purine nucleoside phosphorylase (EC 2.4.2.1) (Inosine phosphorylase) (PNP) - Homo sapiens (Human) (sp|P00491|PNPH_HUMAN; 7275)	1
Ras-related protein Rap-1b OS=Homo sapiens GN=RAP1B PE=1 SV=1 (sp|P61224|RAP1B_HUMAN; 6232)	1
Superoxide dismutase [Mn], mitochondrial precursor (EC 1.15.1.1) - Homo sapiens (Human) (sp|P04179|SODM_HUMAN; 394788)	1
triosephosphate isomerase 1 [Homo sapiens] (ref|NP_000356.1|; 5513)	1
tropomyosin 4 [Homo sapiens] (ref|NP_003281.1|; 12588)	1
actin related protein 2/3 complex subunit 1B [Homo sapiens] (ref|NP_005711.1|; 23132)	1
Alpha-actinin-1 (Alpha-actinin cytoskeletal isoform) (Non-muscle alpha-actinin-1) (F-actin cross-lin (sp|P12814|ACTN1_HUMAN; 7743)	1
Beta-parvin (Affixin) - Homo sapiens (Human) (sp|Q9HBI1|PARVB_HUMAN; 17369)	1
Bone morphogenetic protein 1 precursor (EC 3.4.24.19) (BMP-1) (Procollagen C-proteinase) (PCP) (Mamm (sp|P13497|BMP1_HUMAN; 23905)	1
chloride intracellular channel 4 [Homo sapiens] (ref|NP_039234.1|; 417)	1
Corneodesmosin precursor (S protein) - Homo sapiens (Human) (sp|Q15517|CDSN_HUMAN; 21316)	1
Desmocollin-3 precursor (Desmocollin-4) (HT-CP) - Homo sapiens (Human) (sp|Q14574|DSC3_HUMAN; 11747)	1
Elongationfactor 1-alpha 1 OS=Homo sapiens GN=EEF1A1 PE=1 SV=1 (sp|P68104|EF1A1_HUMAN; 21859)	1
espin [Homo sapiens] (ref|NP_113663.2|; 437864)	1
Filamin A, alpha (Actin binding protein 280) - Homo sapiens (Human) (tr|Q5HY55|Q5HY55_HUMAN; 26736)	1
Filamin-B (FLN-B) (Beta-filamin) (Actin-binding-like protein) (Thyroid autoantigen) (Truncated actin (sp|O75369|FLNB_HUMAN; 394858)	1
Late cornified envelope protein 1C (Late envelope protein 3) - Homo sapiens (Human) (sp|Q5T751|LCE1C_HUMAN; 1559)	1
LIM and senescent cell antigen-like domains 1 [Homo sapiens] (ref|NP_004978.2|; 14589)	1
myosin, heavy polypeptide 9, non-muscle [Homo sapiens] (ref|NP_002464.1|P35579; 17154)	1
Nucleosome assembly protein 1-like 1 (NAP-1-related protein) (hNRP) - Homo sapiens (Human) (sp|P55209|NP1L1_HUMAN; 6294)	1
Pleckstrin (Platelet p47 protein) - Homo sapiens (Human) (sp|P08567|PLEK_HUMAN; 1598337)	1
Properdin precursor (Factor P) - Homo sapiens (Human) (sp|P27918|PROP_HUMAN; 26068)	1
Protein-glutamine gamma-glutamyltransferase K (EC 2.3.2.13) (Transglutaminase K) (TGase K) (TGK) (TG (sp|P22735|TGM1_HUMAN; 7430)	1
ras suppressor protein 1 isoform 1 [Homo sapiens] (ref|NP_036557.1|; 2747)	1
Secreted phosphoprotein 24 precursor (Spp-24) (Secreted phosphoprotein 2) - Homo sapiens (Human) (sp|Q13103|SPP24_HUMAN; 15425)	1
SPARC precursor (Secreted protein acidic and rich in cysteine) (Osteonectin) (ON) (Basement-membrane (sp|P09486|SPRC_HUMAN; 20704)	1
Talin-1 - Homo sapiens (Human) (sp|Q9Y490|TLN1_HUMAN; 394178)	1
Tax_Id=9606 RecName: Full=Latent-transforming growth factor beta-binding protein 1; Short=LTBP-1; Al (unkn|Q14766|LTBP1_HUMAN; 17982017)	1
Thrombospondin-1 precursor - Homo sapiens (Human) (sp|P07996|TSP1_HUMAN; 394117)	1
Titin (Connectin) (Rhabdomyosarcoma antigen MU-RMS-40.14 (sp|Q8WZ42|TITIN_HUMAN; 4299208)	1
Transforming growth factor beta-1 precursor (TGF-beta-1) [Contains: Latency-associated peptide (LAP) (sp|P01137|TGFB1_HUMAN; 504619)	1
Tropomyosin alpha-3 chain (Tropomyosin-3) (Tropomyosin gamma) (hTM5) - Homo sapiens (Human) (sp|P06753|TPM3_HUMAN; 509911)	1
14-3-3 protein gamma OS=Homo sapiens GN=YWHAG PE=1 SV=2 (sp|P61981|1433G_HUMAN; 22984)	1
Unc-112-related protein 2 (Kindlin-3) (MIG2-like) - Homo sapiens (Human) (sp|Q86UX7|URP2_HUMAN; 4603)	1
vinculin isoform meta-VCL [Homo sapiens] (ref|NP_054706.1|; 3171)	1
Zinc finger CCHC domain-containing protein 11 - Homo sapiens (Human) (sp|Q5TAX3|ZCH11_HUMAN; 447051)	1
zinc finger protein 75 [Homo sapiens] (ref|NP_009062.2|; 26585)	1
Ig heavy chain V-III region CAM - Homo sapiens (Human) (sp|P01768|HV3G_HUMAN; 337442)	0.999261
C4b-binding protein beta chain precursor - Homo sapiens (Human) (sp|P20851|C4BB_HUMAN; 2282)	0.998886
Hornerin - Homo sapiens (Human) (sp|Q86YZ3|HORN_HUMAN; 414089)	0.998484
C4b-binding protein alpha chain precursor (C4bp) (Proline-rich protein) (PRP) - Homo sapiens (Human) (sp|P04003|C4BP_HUMAN; 2283)	0.995981
Vitamin K-dependent protein S precursor - Homo sapiens (Human) (sp|P07225|PROS_HUMAN; 18160)	0.995017
Actin, cytoplasmic 2 OS=Homo sapiens GN=ACTG1 PE=1 SV=1 (sp|P63261|ACTG_HUMAN; 11535)	0.99249
lactate dehydrogenase A [Homo sapiens] (ref|NP_005557.1|; 4125)	0.990148
Chain , Human Recombinant Epidermal Fatty Acid Binding Protein (pdb|1B56|; 4459)	0.988708
Keratinocyte proline-rich protein (ref|NP_001020402.1|Q5T749; 482159)	0.98688
Glyceraldehyde-3-phosphate dehydrogenase (pdb|1U8F|P04406; 5485)	0.984147
similar to F-box only protein 2 [Homo sapiens] (ref|NP_001001414.1|; 508274)	0.983754
Protein S100-A9 (S100 calcium-binding protein A9) (Calgranulin-B) (Migration inhibitory factor-relat (sp|P06702|S10A9_HUMAN; 1574)	0.983634
Fibrinogen gamma chain precursor - Homo sapiens (Human) (sp|P02679|FIBG_HUMAN; 19713)	0.978941
Complement component C9 precursor [Contains: Complement component C9a; Complement component C9b] - H (sp|P02748|CO9_HUMAN; 20011)	0.974955
Fibrinogen beta chain precursor [Contains: Fibrinopeptide B] - Homo sapiens (Human) (sp|P02675|FIBB_HUMAN; 19710)	0.971192
complement component 5 [Homo sapiens] (ref|NP_001726.2|; 25325)	0.96045
Desmoplakin (DP) (250/210 kDa paraneoplastic pemphigus antigen) - Homo sapiens (Human) (sp|P15924|DESP_HUMAN; 21008)	0.951527
Coagulation factor XIII A chain precursor (Coagulation factor XIIIa) (Protein-glutamine gamma-glutam (sp|P00488|F13A_HUMAN; 524148)	0.944125
filaggrin 2 [Homo sapiens] (ref|NP_001014364.1|; 630204)	0.938061
Transglutaminase 3 (E polypeptide, protein-glutamine-gamma-glutamyltransferase) - Homo sapiens (Huma (tr|Q32MM0|Q32MM0_HUMAN; 2612701)	0.936831
annexin A2 isoform 2 [Homo sapiens] (ref|NP_004030.1|; 393888)	0.936446
Ig heavy chain V-III region JON - Homo sapiens (Human) (sp|P01780|HV3S_HUMAN; 337450)	0.931538
Fibrinogen alpha chain precursor [Contains: Fibrinopeptide A] - Homo sapiens (Human) (sp|P02671|FIBA_HUMAN; 19711)	0.926449
complement component C6 precursor peptid (gb|AAA51860.1|; 20023)	0.91804
junction plakoglobin [Homo sapiens] (ref|NP_002221.1|; 10849)	0.917677
Protein S100-A8 (pdb|1MR8|P05109; 1576)	0.915831
Ig heavy chain V-III region GA - Homo sapiens (Human) (sp|P01769|HV3H_HUMAN; 337443)	0.912052
Late envelope protein 7 (LEP7) - Homo sapiens (Human) (tr|Q5T750|Q5T750_HUMAN; 473194)	0.910272
Ig heavy chain V-I region HG3 precursor - Homo sapiens (Human) (sp|P01743|HV1B_HUMAN; 357309)	0.896224
Plakophilin-1 (Band-6 protein) (B6P) - Homo sapiens (Human) (sp|Q13835|PKP1_HUMAN; 2168)	0.881216
small proline-rich protein 1A [Homo sapiens] (ref|NP_005978.2|; 1565)	0.874778
Ig heavy chain V-III region BUT - Homo sapiens (Human) (sp|P01767|HV3F_HUMAN; 337441)	0.873059
Ig heavy chain V-II region ARH-77 precursor - Homo sapiens (Human) (sp|P06331|HV2I_HUMAN; 337459)	0.866688
Dermcidin precursor (Preproteolysin) [Contains: Survival-promoting peptide; DCD-1] - Homo sapiens (H (sp|P81605|DCD_HUMAN; 6047)	0.859939
Small proline-rich protein 2D (SPR-2D) (Small proline-rich protein II) (SPR-II) - Homo sapiens (Huma (sp|P22532|SPR2D_HUMAN; 1568)	0.846968
Ig gamma-3 chain C region (allotype G3m(b)) - human (pir||A23511; 524049)	0.825612
Ig gamma-1 chain C region - Homo sapiens (Human) (sp|P01857|IGHG1_HUMAN; 444992)	0.819586
Bleomycin hydrolase (EC 3.4.22.40) (BLM hydrolase) (BMH) (BH) - Homo sapiens (Human) (sp|Q13867|BLMH_HUMAN; 429212)	0.810161
Ig heavy chain V-III region GAL - Homo sapiens (Human) (sp|P01781|HV3T_HUMAN; 337451)	0.805029
Tax_Id=9606 RecName: Full=Ig gamma-2 chain C region; (unkn|P01859|IGHG2_HUMAN; 17982015)	0.788441
Complement component C8 gamma chain precursor - Homo sapiens (Human) (sp|P07360|CO8G_HUMAN; 25710)	0.779275
Serpin B4 (Squamous cell carcinoma antigen 2) (SCCA-2) (Leupin) - Homo sapiens (Human) (sp|P48594|SPB4_HUMAN; 11911)	0.778844
Complement component C7 precursor - Homo sapiens (Human) (sp|P10643|CO7_HUMAN; 430541)	0.77579
Ig heavy chain V-III region WEA - Homo sapiens (Human) (sp|P01763|HV3B_HUMAN; 340341)	0.751329
Ig heavy chain V-II region WAH - Homo sapiens (Human) (sp|P01824|HV2F_HUMAN; 335958)	0.747057
Ig gamma-4 chain C region - Homo sapiens (Human) (sp|P01861|IGHG4_HUMAN; 8187)	0.725254
Ig heavy chain V-III region VH26 precursor - Homo sapiens (Human) (sp|P01764|HV3C_HUMAN; 357821)	0.719371
Ig heavy chain V-III region BRO - Homo sapiens (Human) (sp|P01766|HV3E_HUMAN; 357310)	0.694183
Complement factor H-related 1 - Homo sapiens (Human) (tr|Q5TFM6|Q5TFM6_HUMAN; 2132)	0.683848
Ig heavy chain V-III region KOL - Homo sapiens (Human) (sp|P01772|HV3K_HUMAN; 352207)	0.637202
Chain A, Crystal Structure Of The Human Sigma Isoform Of 14-3-3 In Complex With A Mode-1 Phosphopept (pdb|1YWT|A; 474)	0.595725
Tax_Id=9606 Gene_Symbol=CFH Isoform 1 of Complement factor H precursor (unkn|IPI00029739|IPI:IPI00029739.5|SW; 17220796)	0.595276
Complement C1q subcomponent subunit C precursor - Homo sapiens (Human) (sp|P02747|C1QC_HUMAN; 378)	0.565429
Apolipoprotein E precursor (Apo-E) - Homo sapiens (Human) (sp|P02649|APOE_HUMAN; 13190)	0.560535
Fibronectin precursor (FN) (Cold-insoluble globulin) (CIG) - Homo sapiens (Human) (sp|P02751|FINC_HUMAN; 392799)	0.544512
Tax_Id=9606 Gene_Symbol=GSDM1 Gasdermin (unkn|IPI00166200|IPI:IPI00166200.4|SW; 17220909)	0.53161
Ig heavy chain V-III region TUR - Homo sapiens (Human) (sp|P01779|HV3R_HUMAN; 337449)	0.489011
Ig heavy chain V-I region V35 precursor - Homo sapiens (Human) (sp|P23083|HV1G_HUMAN; 337466)	0.483545
Ig heavy chain V-I region Mot - Homo sapiens (Human) (sp|P06326|HV1F_HUMAN; 337458)	0.482699
14-3-3 protein epsilon OS=Homo sapiens GN=YWHAE PE=1 SV=1 (sp|P62258|1433E_HUMAN; 10133)	0.482632
Neutrophil defensin 1 precursor (HNP-1) (HP-1) (HP1) (Defensin, alpha 1) [Contains: HP 1-56; Neutrop (sp|P59665|DEF1_HUMAN; 23778)	0.476827
Polyubiquitin-C (pdb|1UBQ|P0CG48; 110414)	0.463751
Complement C1q subcomponent subunit A precursor - Homo sapiens (Human) (sp|P02745|C1QA_HUMAN; 376)	0.439266
Ig lambda chain V-III region LOI - Homo sapiens (Human) (sp|P80748|LV3B_HUMAN; 337568)	0.420301
Ig kappa chain V-III region POM - Homo sapiens (Human) (sp|P01624|KV3F_HUMAN; 336522)	0.389188
Clusterin precursor (Complement-associated protein SP-40,40) (Complement cytolysis inhibitor) (CLI) (sp|P10909|CLUS_HUMAN; 23971)	0.388158
Lysozyme C precursor (EC 3.2.1.17) (1,4-beta-N-acetylmuramidase C) - Homo sapiens (Human) (sp|P61626|LYSC_HUMAN; 6249)	0.388156
Plasminogen precursor (EC 3.4.21.7) [Contains: Plasmin heavy chain A; Activation peptide; Angiostati (sp|P00747|PLMN_HUMAN; 22361)	0.363815
Ig lambda chain V-III region SH - Homo sapiens (Human) (sp|P01714|LV3A_HUMAN; 337553)	0.35591
Complement component C8 alpha chain precursor (Complement component 8 subunit alpha) - Homo sapiens (sp|P07357|CO8A_HUMAN; 943)	0.35386
complement component 3 precursor [Homo sapiens] (ref|NP_000055.2|; 392824)	0.307697
Ig lambda chain V-I region WAH - Homo sapiens (Human) (sp|P04208|LV1F_HUMAN; 336564)	0.289012
Complement C4-B precursor (Basic complement C4) [Contains: Complement C4 beta chain; Complement C4-B (sp|P0C0L5|CO4B_HUMAN; 392823)	0.286555
Ig lambda chain C regions - Homo sapiens (Human) (sp|P01842|LAC_HUMAN; 342716)	0.276111
Complement C1q subcomponent subunit B precursor - Homo sapiens (Human) (sp|P02746|C1QB_HUMAN; 485189)	0.22656
Ig lambda chain V-IV region Hil - Homo sapiens (Human) (sp|P01717|LV4C_HUMAN; 337555)	0.15869
Complement component C8 beta chain precursor (Complement component 8 subunit beta) - Homo sapiens (H (sp|P07358|CO8B_HUMAN; 392881)	0.154089
Vitronectin precursor (Serum-spreading factor) (S-protein) (V75) [Contains: Vitronectin V65 subunit; (sp|P04004|VTNC_HUMAN; 10553)	0.118181
Chain , Recombinant Le (pdb|2LVE|; 337509)	0.114018
Ig lambda chain V-I region NEWM - Homo sapiens (Human) (sp|P01703|LV1E_HUMAN; 337543)	0.108871
Tax_Id=9606 RecName: Full=Complement C1r subcomponent; EC=3.4.21.41; AltName: Full=Complement compon (unkn|P00736|C1R_HUMAN; 17982011)	0.100338
Serum albumin precursor - Homo sapiens (Human) (sp|P02768|ALBU_HUMAN; 19284)	0.0823169
Gelsolin precursor (Actin-depolymerizing factor) (ADF) (Brevin) (AGEL) - Homo sapiens (Human) (sp|P06396|GELS_HUMAN; 25330)	0.0677075
Beta-2-glycoprotein 1 precursor (Beta-2-glycoprotein I) (Apolipoprotein H) (Apo-H) (B2GPI) (Beta(2)G (sp|P02749|APOH_HUMAN; 11286)	0.0666148
Ig kappa chain V-III region HIC precursor - Homo sapiens (Human) (sp|P18136|KV3M_HUMAN; 336560)	0.0617738
Ig kappa chain C region - Homo sapiens (Human) (sp|P01834|KAC_HUMAN; 356403)	0.0543465
Ig kappa chain V-I region EU - Homo sapiens (Human) (sp|P01598|KV1F_HUMAN; 342435)	0.0512686
Ig kappa chain V-III region Ti - Homo sapiens (Human) (sp|P01622|KV3D_HUMAN; 337508)	0.0422864
Ig mu heavy chain disease protein (BOT) - Homo sapiens (Human) (sp|P04220|MUCB_HUMAN; 444989)	0.0403068
Complement factor H-related protein 2 precursor (FHR-2) (H factor-like protein 2) (H factor-like 3) (sp|P36980|FHR2_HUMAN; 2135)	0.0312428
Ig lambda chain V-I region NEW - Homo sapiens (Human) (sp|P01701|LV1C_HUMAN; 337541)	0.0296335
Ig kappa chain V-I region AG - Homo sapiens (Human) (sp|P01593|KV1A_HUMAN; 335972)	0.0294089
Ig kappa chain V-III region VG precursor (Fragment) - Homo sapiens (Human) (sp|P04433|KV3I_HUMAN; 355207)	0.0283606
Complement C1s subcomponent precursor (EC 3.4.21.42) (C1 esterase) [Contains: Complement C1s subcomp (sp|P09871|C1S_HUMAN; 445996)	0.0272166
Histidine-rich glycoprotein precursor (Histidine-proline-rich glycoprotein) (HPRG) - Homo sapiens (H (sp|P04196|HRG_HUMAN; 18798)	0.0230382
Ig kappa chain V-I region CAR - Homo sapiens (Human) (sp|P01596|KV1D_HUMAN; 337494)	0.0207299
HistoneH4 OS=Homo sapiens GN=HIST1H4A PE=1 SV=2 (sp|P62805|H4_HUMAN; 1438)	0.0202719
Ig kappa chain V-I region BAN - Homo sapiens (Human) (sp|P04430|KV1V_HUMAN; 357326)	0.0182585
Chain B, Hemoglobin (Deoxy) Mutant With Additional Met At The N-Terminus Of The Beta Chains (pdb|1DXT|B; 3927)	0.0151963
Zinc-alpha-2-glycoprotein precursor (Zn-alpha-2-glycoprotein) (Zn-alpha-2-GP) - Homo sapiens (Human) (sp|P25311|ZA2G_HUMAN; 471170)	0.0149592
Ig kappa chain V-II region TEW - Homo sapiens (Human) (sp|P01617|KV2D_HUMAN; 337506)	0.00942281
1 of Ig mu chain C region OS=Homo sapiens GN=IGHM (unkn|sp|P01871-1|IGHM_HUM|Isoform; 17394026)	0.00837538
CD5 antigen-like precursor (SP-alpha) (CT-2) (IgM-associated peptide) - Homo sapiens (Human) (sp|O43866|CD5L_HUMAN; 1770)	0.00633898
Ig alpha-1 chain C region - Homo sapiens (Human) (sp|P01876|IGHA1_HUMAN; 445154)	0.00577696
Haptoglobin-related protein precursor - Homo sapiens (Human) (sp|P00739|HPTR_HUMAN; 444785)	0.00425749
Apolipoprotein D precursor (Apo-D) (ApoD) - Homo sapiens (Human) (sp|P05090|APOD_HUMAN; 25779)	0.00362667
Serotransferrin precursor (Transferrin) (Siderophilin) (Beta-1-metal-binding globulin) - Homo sapien (sp|P02787|TRFE_HUMAN; 388655)	0.00329818
Haptoglobin precursor [Contains: Haptoglobin alpha chain; Haptoglobin beta chain] - Homo sapiens (Hu (sp|P00738|HPT_HUMAN; 444784)	0.00189094
Chain A, Hemoglobin (Alpha + Met) Variant (pdb|1BZ1|A; 8986)	0.000932143
inter-alpha (globulin) inhibitor H4 [Homo sapiens] (ref|NP_002209.2|; 18032)	0.000632948
Complement factor B precursor (EC 3.4.21.47) (C3/C5 convertase) (Properdin factor B) (Glycine-rich b (sp|P00751|CFAB_HUMAN; 428089)	0.000503451
Apolipoprotein A-I precursor (Apo-AI) (ApoA-I) [Contains: Apolipoprotein A-I(1-242)] - Homo sapiens (sp|P02647|APOA1_HUMAN; 5182)	8.65161e-05
Alpha-2-macroglobulin precursor (Alpha-2-M) - Homo sapiens (Human) (sp|P01023|A2MG_HUMAN; 392778)	6.69039e-05
Alpha-1-antitrypsin precursor (Alpha-1 protease inhibitor) (Alpha-1-antiproteinase) - Homo sapiens ( (sp|P01009|A1AT_HUMAN; 8021)	5.46789e-05
Apolipoprotein B-100 precursor (Apo B-100) [Contains: Apolipoprotein B-48 (Apo B-48)] - Homo sapiens (sp|P04114|APOB_HUMAN; 392798)	0
Ceruloplasmin precursor (EC 1.16.3.1) (Ferroxidase) - Homo sapiens (Human) (sp|P00450|CERU_HUMAN; 392776)	0
Hemopexin precursor (Beta-1B-glycoprotein) - Homo sapiens (Human) (sp|P02790|HEMO_HUMAN; 3985)	0
Transthyretin precursor (Prealbumin) (TBPA) (TTR) (ATTR) - Homo sapiens (Human) (sp|P02766|TTHY_HUMAN; 11756)	0
inter-alpha globulin inhibitor H2 polypeptide [Homo sapiens] (ref|NP_002207.2|; 2690)	0
Vitamin D-binding protein precursor (DBP) (Group-specific component) (Gc-globulin) (VDB) - Homo sapi (sp|P02774|VTDB_HUMAN; 427313)	0
Alpha-1-antichymotrypsin precursor (ACT) [Contains: Alpha-1-antichymotrypsin His-Pro-less] - Homo sa (sp|P01011|AACT_HUMAN; 514677)	0
Inter-alpha-trypsin inhibitor heavy chain H1 precursor (ITI heavy chain H1) (Inter-alpha-inhibitor h (sp|P19827|ITIH1_HUMAN; 18030)	0
Apolipoprotein A-IV precursor (Apo-AIV) (ApoA-IV) - Homo sapiens (Human) (sp|P06727|APOA4_HUMAN; 446178)	0
Plasma protease C1 inhibitor precursor (C1 Inh) (C1Inh) (C1 esterase inhibitor) (C1-inhibiting facto (sp|P05155|IC1_HUMAN; 4411)	0
Antithrombin-III precursor (ATIII) - Homo sapiens (Human) (sp|P01008|ANT3_HUMAN; 2009)	0
Alpha-1-acid glycoprotein 1 precursor (AGP 1) (Orosomucoid-1) (OMD 1) - Homo sapiens (Human) (sp|P02763|A1AG1_HUMAN; 392774)	0
Alpha-1B-glycoprotein precursor (Alpha-1-B glycoprotein) - Homo sapiens (Human) (sp|P04217|A1BG_HUMAN; 392814)	0
Alpha-2-HS-glycoprotein precursor (Fetuin-A) (Alpha-2-Z-globulin) (Ba-alpha-2-glycoprotein) [Contain (sp|P02765|FETUA_HUMAN; 392812)	0
Alpha-1-acid glycoprotein 2 precursor (AGP 2) (Orosomucoid-2) (OMD 2) - Homo sapiens (Human) (sp|P19652|A1AG2_HUMAN; 25282)	0
kininogen [Homo sapiens (gb|AAB59550.1|; 18800)	0
Prothrombin precursor (EC 3.4.21.5) (Coagulation factor II) [Contains: Activation peptide fragment 1 (sp|P00734|THRB_HUMAN; 392792)	0
AMBP protein precursor [Contains: Alpha-1-microglobulin (Protein HC) (Complex-forming glycoprotein h (sp|P02760|AMBP_HUMAN; 25278)	0
Ig kappa chain V-III region NG9 precursor (Fragment) - Homo sapiens (Human) (sp|P01621|KV3C_HUMAN; 336521)	0
Serum paraoxonase/arylesterase 1 (PON 1) (Serum aryldialkylphosphatase 1) (A-esterase 1) (Aromatic e (sp|P27169|PON1_HUMAN; 392828)	0
Angiotensinogen precursor [Contains: Angiotensin-1 (Angiotensin I) (Ang I); Angiotensin-2 (Angiotens (sp|P01019|ANGT_HUMAN; 2480)	0
Alpha-2-antiplasmin precursor (Alpha-2-plasmin inhibitor) (Alpha-2-PI) (Alpha-2-AP) - Homo sapiens ( (sp|P08697|A2AP_HUMAN; 10147)	0
Afamin precursor (Alpha-albumin) (Alpha-Alb) - Homo sapiens (Human) (sp|P43652|AFAM_HUMAN; 445299)	0
Heparin cofactor 2 precursor (Heparin cofactor II) (HC-II) (Protease inhibitor leuserpin 2) (HLS2) - (sp|P05546|HEP2_HUMAN; 16891)	0
apolipoprotein L1 isoform a precursor [Homo sapiens (ref|NP_003652.2|; 17153)	0
Serum amyloid P-component precursor (SAP) (9.5S alpha-1-glycoprotein) [Contains: Serum amyloid P-com (sp|P02743|SAMP_HUMAN; 1810)	0
Complement factor I precursor (EC 3.4.21.45) (C3B/C4B inactivator) [Contains: Complement factor I he (sp|P05156|CFAI_HUMAN; 412090)	0
Plasma retinol-binding protein precursor (PRBP) (RBP) [Contains: Plasma retinol-binding protein(1-18 (sp|P02753|RETBP_HUMAN; 3305)	0
Serum amyloid A-4 protein precursor (Constitutively expressed serum amyloid A protein) (C-SAA) - Hom (sp|P35542|SAA4_HUMAN; 352553)	0
Ig kappa chain V-III region SIE - Homo sapiens (Human) (sp|P01620|KV3B_HUMAN; 353196)	0
Ig kappa chain V-I region HK102 precursor (Fragment) - Homo sapiens (Human) (sp|P01602|KV1J_HUMAN; 356795)	0
Ficolin-3 precursor (Collagen/fibrinogen domain-containing protein 3) (Collagen/fibrinogen domain-co (sp|O75636|FCN3_HUMAN; 488)	0
Gene_Symbol=IGHA2 Ig alpha-2 chain C region (unkn|IPI:IPI00641229.4|SW|Tax_Id=9606; 17522711)	0
hypothetical protein LOC391123 [Homo sapiens] (ref|NP_001013683.1|; 487144)	0
Ig kappa chain V-I region Wes - Homo sapiens (Human) (sp|P01611|KV1S_HUMAN; 337501)	0
Immunoglobulin J chain - Homo sapiens (Human) (sp|P01591|IGJ_HUMAN; 335195)	0
Pigment epithelium-derived factor precursor (PEDF) (Serpin-F1) (EPC-1) - Homo sapiens (Human) (sp|P36955|PEDF_HUMAN; 388667)	0
Complement C2 precursor (EC 3.4.21.43) (C3/C5 convertase) [Contains: Complement C2b fragment; Comple (sp|P06681|CO2_HUMAN; 21391)	0
Carboxypeptidase N subunit 2 precursor (Carboxypeptidase N polypeptide 2) (Carboxypeptidase N 83 kDa (sp|P22792|CPN2_HUMAN; 448313)	0
Leucine-rich alpha-2-glycoprotein precursor (LRG) - Homo sapiens (Human) (sp|P02750|A2GL_HUMAN; 12187)	0
Ig kappa chain V-II region RPMI 6410 precursor - Homo sapiens (Human) (sp|P06310|KV2F_HUMAN; 356804)	0
Histone H2B type F-S (H2B.s) (H2B/s) (sp|P57053|H2BFS_HUMAN; 16698)	0
Ig kappa chain V-I region Roy - Homo sapiens (Human) (sp|P01608|KV1P_HUMAN; 336519)	0
Apolipoprotein A-II precursor (Apo-AII) (ApoA-II) [Contains: Apolipoprotein A-II(1-76)] - Homo sapie (sp|P02652|APOA2_HUMAN; 1875)	0
Apolipoprotein(a) precursor (EC 3.4.21.-) (Apo(a)) (Lp(a)) - Homo sapiens (Human) (sp|P08519|APOA_HUMAN; 429001)	0
Apolipoprotein M (Apo-M) (ApoM) (Protein G3a) - Homo sapiens (Human) (sp|O95445|APOM_HUMAN; 21351)	0
Ig lambda chain V region 4A precursor - Homo sapiens (Human) (sp|P04211|LV0A_HUMAN; 356625)	0
Inter-alpha (Globulin) inhibitor H3 - Homo sapiens (Human) (tr|Q3B7H5|Q3B7H5_HUMAN; 520729)	0
Ig lambda chain V-I region NIG-64 - Homo sapiens (Human) (sp|P01702|LV1D_HUMAN; 337542)	0
glycosylphosphatidylinositol specific phospholipase D1 isoform 1 precursor [Homo sapiens] (ref|NP_001494.2|; 21102)	0
Chain A, Crystal Structure Of Apo S100a3 (pdb|1KSO|A; 13809)	0
Immunoglobulin lambda-like polypeptide 1 precursor (Immunoglobulin-related protein 14.1) (Immunoglob (sp|P15814|IGLL1_HUMAN; 16948)	0
Plasma kallikrein precursor (EC 3.4.21.34) (Plasma prekallikrein) (Kininogenin) (Fletcher factor) [C (sp|P03952|KLKB1_HUMAN; 394873)	0
FYVE, RhoGEF and PH domain-containing protein 6 (Zinc finger FYVE domain-containing protein 24) - Ho (sp|Q6ZV73|FGD6_HUMAN; 622392)	0
Ig kappa chain V-IV region JI precursor - Homo sapiens (Human) (sp|P06313|KV4B_HUMAN; 357329)	0
Ig kappa chain V-I region Lay - Homo sapiens (Human) (sp|P01605|KV1M_HUMAN; 338756)	0
Coagulation factor XII precursor (EC 3.4.21.38) (Hageman factor) (HAF) [Contains: Coagulation factor (sp|P00748|FA12_HUMAN; 450519)	0
Ig kappa chain V-II region GM607 precursor (Fragment) - Homo sapiens (Human) (sp|P06309|KV2E_HUMAN; 337515)	0
Corticosteroid-binding globulin precursor (CBG) (Transcortin) (Serpin A6) - Homo sapiens (Human) (sp|P08185|CBG_HUMAN; 8019)	0
Ig kappa chain V-I region DEE - Homo sapiens (Human) (sp|P01597|KV1E_HUMAN; 337495)	0
Insulin-like growth factor-binding protein complex acid labile chain precursor (ALS) - Homo sapiens (sp|P35858|ALS_HUMAN; 9090)	0
N-acetylmuramoyl-L-alanine amidase precursor (EC 3.5.1.28) (Peptidoglycan recognition protein long) (sp|Q96PD5|PGRP2_HUMAN; 12571)	0
Chain A, Wat, A Variable Domain From Immunoglobulin Light-Chain (Bence-Jones Protein) (pdb|1WTL|A; 353569)	0
Kallistatin precursor (Serpin A4) (Kallikrein inhibitor) (Protease inhibitor 4) - Homo sapiens (Huma (sp|P29622|KAIN_HUMAN; 8027)	0
Ig kappa chain V-I region AU - Homo sapiens (Human) (sp|P01594|KV1B_HUMAN; 335973)	0
Ig kappa chain V-III region IARC/BL41 precursor - Homo sapiens (Human) (sp|P06311|KV3K_HUMAN; 357328)	0
Ig lambda chain V-I region VOR - Homo sapiens (Human) (sp|P01699|LV1A_HUMAN; 337540)	0
Histone H2B 7 (pdb|2HIO|P0C1H5; 1437)	0
Attractin precursor (Mahogany homolog) (DPPT-L) - Homo sapiens (Human) (sp|O75882|ATRN_HUMAN; 15618)	0
Ig kappa chain V-I region WEA - Homo sapiens (Human) (sp|P01610|KV1R_HUMAN; 336520)	0
Ig lambda chain V-II region BUR - Homo sapiens (Human) (sp|P01708|LV2E_HUMAN; 337548)	0
Ig kappa chain V-II region MIL - Homo sapiens (Human) (sp|P01616|KV2C_HUMAN; 337505)	0
Ig kappa chain V-II region Cum - Homo sapiens (Human) (sp|P01614|KV2A_HUMAN; 337503)	0
Ig kappa chain V-III region GOL (Rheumatoid factor) - Homo sapiens (Human) (sp|P04206|KV3G_HUMAN; 357325)	0
Ig kappa chain V-I region Walker precursor - Homo sapiens (Human) (sp|P04431|KV1W_HUMAN; 356803)	0
Lumican precursor (Keratan sulfate proteoglycan lumican) (KSPG lumican) - Homo sapiens (Human) (sp|P51884|LUM_HUMAN; 6341)	0
Ig kappa chain V-II region FR - Homo sapiens (Human) (sp|P01615|KV2B_HUMAN; 337504)	0
Ventral anterior homeobox 1 - Homo sapiens (Human) (sp|Q5SQQ9|VAX1_HUMAN; 529873)	0
Ig kappa chain V-III region VH precursor (Fragment) - Homo sapiens (Human) (sp|P04434|KV3J_HUMAN; 355208)	0
Cholinesterase precursor (EC 3.1.1.8) (Acylcholine acylhydrolase) (Choline esterase II) (Butyrylchol (sp|P06276|CHLE_HUMAN; 18648)	0
Adiponectin precursor (Adipocyte, C1q and collagen domain-containing protein) (30 kDa adipocyte comp (sp|Q15848|ADIPO_HUMAN; 18804)	0
Ig lambda chain V-VI region EB4 precursor - Homo sapiens (Human) (sp|P06319|LV6E_HUMAN; 337564)	0
Ig kappa chain V-I region Scw - Homo sapiens (Human) (sp|P01609|KV1Q_HUMAN; 337500)	0
Tax_Id=9606 Gene_Symbol=A2ML1 Alpha-2-macroglobulin-like protein 1 precursor (unkn|IPI00419215|IPI:IPI00419215.5|SW; 17379671)	0
Thyroxine-binding globulin precursor (T4-binding globulin) (Serpin A7) - Homo sapiens (Human) (sp|P05543|THBG_HUMAN; 26409)	0
Leucine-rich repeat-containing protein 15 precursor (hLib) - Homo sapiens (Human) (sp|Q8TF66|LRC15_HUMAN; 18842)	0
coagulation factor XIII B subunit precursor [Homo sapiens] (ref|NP_001985.2|; 2137)	0
Apolipoprotein C-IV precursor (Apo-CIV) (ApoC-IV) - Homo sapiens (Human) (sp|P55056|APOC4_HUMAN; 13192)	0
Desmoglein-4 precursor - Homo sapiens (Human) (sp|Q86SJ6|DSG4_HUMAN; 11753)	0
H2A histone family, member O [Homo sapiens] (ref|NP_003507.1|Q6FI13; 1439)	0
Tetranectin precursor (TN) (C-type lectin domain family 3 member B) (Plasminogen kringle 4-binding p (sp|P05452|TETN_HUMAN; 500344)	0
ATP-binding cassette sub-family A member 1 (ATP-binding cassette transporter 1) (ATP-binding cassett (sp|O95477|ABCA1_HUMAN; 446726)	0
Coagulation factor V precursor (Activated protein C cofactor) [Contains: Coagulation factor V heavy (sp|P12259|FA5_HUMAN; 625010)	0
Tubulinalpha-1B chain OS=Homo sapiens GN=TUBA1B PE=1 SV=1 (sp|P68363|TBA1B_HUMAN; 446125)	0
ficolin 2 isoform a precursor [Homo sapiens] (ref|NP_004099.2|; 25636)	0
Apolipoprotein C-I precursor (Apo-CI) (ApoC-I) - Homo sapiens (Human) (sp|P02654|APOC1_HUMAN; 13191)	0
Mannose-binding protein C precursor (MBP-C) (MBP1) (Mannan-binding protein) (Mannose-binding lectin) (sp|P11226|MBL2_HUMAN; 3008)	0
plasma glutathione peroxidase 3 precursor [Homo sapiens] (ref|NP_002075.2|; 2133799)	0
Ig lambda chain V-I region HA - Homo sapiens (Human) (sp|P01700|LV1B_HUMAN; 336563)	0
Galectin-3-binding protein precursor (Lectin galactoside-binding soluble 3-binding protein) (Mac-2-b (sp|Q08380|LG3BP_HUMAN; 11485)	0
Hepatocyte growth factor activator precursor (EC 3.4.21.-) (HGF activator) (HGFA) [Contains: Hepatoc (sp|Q04756|HGFA_HUMAN; 18979)	0
Ig heavy chain V-III region BUR - Homo sapiens (Human) (sp|P01773|HV3L_HUMAN; 337446)	0
Caspase-14 precursor (EC 3.4.22.-) (CASP-14) [Contains: Caspase-14 subunit 1; Caspase-14 subunit 2] (sp|P31944|CASPE_HUMAN; 12554)	0
Ig kappa chain V-I region Ni - Homo sapiens (Human) (sp|P01613|KV1U_HUMAN; 337502)	0
Vitamin K-dependent protein C precursor (EC 3.4.21.69) (Autoprothrombin IIA) (Anticoagulant protein (sp|P04070|PROC_HUMAN; 14710)	0
Lipopolysaccharide-binding protein precursor (LBP) - Homo sapiens (Human) (sp|P18428|LBP_HUMAN; 16019)	0
galectin 3 [Homo sapiens] (ref|NP_002297.2|; 7617)	0
Carboxypeptidase N catalytic chain precursor (EC 3.4.17.3) (CPN) (Carboxypeptidase N polypeptide 1) (sp|P15169|CBPN_HUMAN; 3417)	0
Proteoglycan-4 precursor (Lubricin) (Megakaryocyte-stimulating factor) (Superficial zone proteoglyca (sp|Q92954|PRG4_HUMAN; 2110)	0
delta globin [Homo sapiens] (ref|NP_000510.1|; 353929)	0
Apolipoprotein C-III precursor (Apo-CIII) (ApoC-III) - Homo sapiens (Human) (sp|P02656|APOC3_HUMAN; 5181)	0
von Willebrand factor precursor (vWF) [Contains: von Willebrand antigen 2 (von Willebrand antigen II (sp|P04275|VWF_HUMAN; 394886)	0
Cystatin C precursor (Neuroendocrine basic polypeptide) (Gamma-trace) (Post-gamma-globulin) - Homo s (sp|P01034|CYTC_HUMAN; 15791)	0
Prolactin-inducible protein precursor (Secretory actin-binding protein) (SABP) (Gross cystic disease (sp|P12273|PIP_HUMAN; 23581)	0
Salivary alpha-amylase precursor (EC 3.2.1.1) (1,4-alpha-D-glucan glucanohydrolase) - Homo sapiens ( (sp|P04745|AMYS_HUMAN; 1213)	0
C-reactive protein precursor [Contains: C-reactive protein(1-205)] - Homo sapiens (Human) (sp|P02741|CRP_HUMAN; 1812)	0
Hyaluronan-binding protein 2 precursor (EC 3.4.21.-) (Plasma hyaluronan-binding protein) (Hepatocyte (sp|Q14520|HABP2_HUMAN; 3573)	0
Cysteine-rich secretory protein 3 precursor (CRISP-3) (SGP28 protein) - Homo sapiens (Human) (sp|P54108|CRIS3_HUMAN; 21754)	0
Plasma serine protease inhibitor precursor (PCI) (Protein C inhibitor) (Serpin A5) (Plasminogen acti (sp|P05154|IPSP_HUMAN; 379415)	0
PREDICTED: similar to glutaredoxin cysteine-rich 1 protein [Homo sapiens (ref|XP_931679.1|; 2682040)	0
Sex hormone-binding globulin precursor (SHBG) (Sex steroid-binding protein) (SBP) (Testis-specific a (sp|P04278|SHBG_HUMAN; 10337)	0
Apolipoprotein F precursor (Apo-F) (Lipid transfer inhibitor protein) (LTIP) - Homo sapiens (Human) (sp|Q13790|APOF_HUMAN; 456622)	0
biotinidase precursor [Homo sapiens] (ref|NP_000051.1|; 17604)	0
Tubulinbeta-2A chain OS=Homo sapiens GN=TUBB2A PE=1 SV=1 (sp|Q13885|TBB2A_HUMAN; 20975)	0
Extracellular matrix protein 1 precursor (Secretory component p85) - Homo sapiens (Human) (sp|Q16610|ECM1_HUMAN; 1464)	0
Endothelial protein C receptor precursor (Endothelial cell protein C receptor) (Activated protein C (sp|Q9UNN8|EPCR_HUMAN; 15930)	0
histone cluster 1, H1d [Homo sapiens] (ref|NP_005311.1|; 21150)	0
Phospholipid transfer protein precursor (Lipid transfer protein II) - Homo sapiens (Human) (sp|P55058|PLTP_HUMAN; 16149)	0
galectin 7 [Homo sapiens] (ref|NP_002298.1|; 12952)	0
Dual specificity protein phosphatase 14 (EC 3.1.3.48) (EC 3.1.3.16) (Mitogen-activated protein kinas (sp|O95147|DUS14_HUMAN; 10714)	0
Mannan-binding lectin serine protease 2 precursor (EC 3.4.21.104) (Mannose-binding protein-associate (sp|O00187|MASP2_HUMAN; 4264443)	0
Multimerin-2 precursor (EMILIN-3) (Elastin microfibril interface located protein 3) (Elastin microfi (sp|Q9H8L6|MMRN2_HUMAN; 448724)	0
Cystatin S precursor (Salivary acidic protein 1) (Cystatin SA-III) - Homo sapiens (Human) (sp|P01036|CYTS_HUMAN; 15792)	0
Ig kappa chain V-IV region STH (Fragment) - Homo sapiens (Human) (sp|P83593|KV4D_HUMAN; 337517)	0
Ig kappa chain V-I region Gal - Homo sapiens (Human) (sp|P01599|KV1G_HUMAN; 337496)	0
carbonic anhydrase I [Homo sapiens] (ref|NP_001729.1|P00915; 24260)	0
AT-hook-containing transcription factor 1 (Embryonic large molecule derived from yolk sac) - Homo sa (sp|Q8WYP5|AHTF1_HUMAN; 630725)	0
Beta-2-microglobulin OS=Homo sapiens GN=B2M PE=1 SV=1 (sp|P61769|B2MG_HUMAN; 8437)	0
collectin sub-family member 11 isoform a [Homo sapiens] (ref|NP_076932.1|; 13833)	0
Ig kappa chain V-III region HAH precursor - Homo sapiens (Human) (sp|P18135|KV3L_HUMAN; 336559)	0
Glutamate dehydrogenase 1, mitochondrial precursor (EC 1.4.1.3) (GDH) - Homo sapiens (Human) (sp|P00367|DHE3_HUMAN; 3237)	0
Heatshock-related 70 kDa protein 2 OS=Homo sapiens GN=HSPA2 PE=1 SV=1 (sp|P54652|HSP72_HUMAN; 7698)	0
Ig heavy chain V-III region WAS - Homo sapiens (Human) (sp|P01776|HV3O_HUMAN; 337447)	0
Cystatin SN precursor (Salivary cystatin SA-1) (Cystain SA-I) - Homo sapiens (Human) (sp|P01037|CYTN_HUMAN; 352403)	0
Ig heavy chain V-III region TEI - Homo sapiens (Human) (sp|P01777|HV3P_HUMAN; 337448)	0
Serum amyloid A protein precursor (SAA) [Contains: Amyloid protein A (Amyloid fibril protein AA); Se (sp|P02735|SAA_HUMAN; 338870)	0
Angiogenin OS=Homo sapiens GN=ANG PE=1 SV=1 (sp|P03950|ANGI_HUMAN; 7281)	0
Insulin-like growth factor-binding protein 6 precursor (IGFBP-6) (IBP-6) (IGF-binding protein 6) - H (sp|P24592|IBP6_HUMAN; 5985)	0
Monocyte differentiation antigen CD14 precursor (Myeloid cell-specific leucine-rich glycoprotein) [C (sp|P08571|CD14_HUMAN; 388664)	0
Ig lambda chain V-V region DEL - Homo sapiens (Human) (sp|P01719|LV5A_HUMAN; 337557)	0
Ribonuclease 4 precursor (EC 3.1.27.-) (RNase 4) - Homo sapiens (Human) (sp|P34096|RNAS4_HUMAN; 7280)	0

## Sheet: S-table 4
S-Table 4. The proteins sorted according to group and decreasing Plasma within the groups that were analysed by SRM (as in figure 2).
The group affiliation, pXIC in plasma, pXIC in plasma adsorption and all the values in figure 2.
Protein with previously known interaction with GAS is marked with *. Plasma control proteins marked with ^
Nr	Protein	Group	pXIC in plasma	pXIC in plasma adsorption	Glycine Elution	Double Digest	Plasma	Ratio
1	Serotransferrin^	1	0,0292	9,65E-05	0.00179587	0.00532707	0.992877	0.337121
2	Apolipoprotein A-I*	1	0,0086	7,43E-07	0.00366886	0.00969568	0.986635	0.378401
3	Haptoglobin^	1	0,0095	1,80E-05	0.0122385	0.0163839	0.971378	0.746984
4	Plasminogen*^	1	0,0022	0,0013	0.0137754	0.0225484	0.963676	0.610929
5	Complement factor B*	1	0,0021	1,05E-06	0.0246263	0.0152983	0.960075	1.60974
6	Histidine-rich glycoprotein	1	4,23E-04	9,97E-06	0.0376631	0.00601425	0.956323	6.2623
7	Apolipoprotein A-IV	1	0,0017	0	0.0124564	0.0318131	0.955731	0.391549
8	inter-alpha (globulin) inhibitor H4	1	7,76E-05	0	0.0140301	0.0334878	0.952482	0.418963
9	Alpha-1-antitrypsin*^	1	0,0143	7,79E-07	0.0260891	0.0232898	0.950621	1.1202
10	Apolipoprotein H	1	8,29E-04	5,92E-05	0.0380757	0.0264908	0.935434	1.43731
11	Gelsolin^	1	9,56E-04	6,94E-05	0.0279548	0.0537981	0.918247	0.519623
12	Hemoglobin (Deoxy)*	1	5,91E-04	9,12E-06	0.0509153	0.0416344	0.90745	1.22291
13	Serum albumin*	1	0,6358	0,0570	0.0776661	0.0194681	0.902866	3.9894
14	Hemoglobin (Alpha + Met)*	1	3,11E-04	2,90E-07	0.0478436	0.0616629	0.890494	0.77589
15	Alpha-2-macroglobulin*^	1	0,0437	2,93E-06	0.0234512	0.0968685	0.87968	0.242094
16	C3*	1	0,0208	0,0093	0.078775	0.0423922	0.878833	1.85824
17	Filaggrin 2	1	7,67E-06	1,16E-04	0.123816	0.011954	0.86423	10.3577
18	C1r*	1	1,58E-04	1,76E-05	0.11984	0.024681	0.855479	4.85555
19	Apolipoprotein A-II	1	9,36E-05	0	0.0660578	0.0798223	0.85412	0.827561
20	Vitronectin*	1	5,57E-04	7,47E-05	0.121319	0.0374818	0.841199	3.23675
21	C4b*	1	0,0029	0,0012	0.10717	0.057138	0.835692	1.87562
22	C1s*	1	1,43E-04	4,00E-06	0.0929137	0.0720628	0.835024	1.28934
23	Metalloproteinase inhibitor 1	1	0	1,25E-06	0.0359377	0.135626	0.828437	0.264977
24	Annexin 1	1	0	9,32E-07	0.0993839	0.0761331	0.824483	1.3054
25	Glycoprotein 340	1	0	0	0.100738	0.0904045	0.808857	1.11431
26	Apolipoprotein C-III	1	5,52E-06	0	0.107457	0.0878833	0.804659	1.22273
27	Serpin B12*	1	0	3,21E-05	0.147668	0.048104	0.804228	3.06976
28	Clusterin	1	0,0013	8,01E-04	0.0640351	0.155548	0.780417	0.411674
29	Catalase	1	0	0	0.09239	0.144654	0.762956	0.638698
30	Ras-related protein Rap-1b	1	0	0	0.172425	0.0684067	0.759168	2.52059
31	Late envelope protein 7	1	2,37E-06	2,41E-05	0.136902	0.112887	0.750211	1.21274
32	Caspase-14	1	7,74E-06	0	0.172651	0.0978445	0.729505	1.76454
33	C7*	1	2,90E-04	0,0010	0.133355	0.149625	0.71702	0.89126
34	C8g*	1	1,67E-04	5,89E-04	0.212177	0.100627	0.687196	2.10855
35	Lactotransferrin	1	0	0	0.252435	0.0686426	0.678922	3.67753
36	C8b*	1	6,12E-05	1,11E-05	0.133724	0.194793	0.671482	0.686493
37	C6*	1	1,97E-04	0,0022	0.217751	0.112097	0.670152	1.94252
38	Superoxide dismutase	1	0	3,18E-06	0.259215	0.0843301	0.656455	3.07382
39	Elongationfactor 1-alpha 1	2	0	4,84E-06	0.514644	0.122913	0.362443	4.18705
40	Stefin	2	0	0	0.459295	0.260008	0.280698	1.76647
41	Coagulation factor XIII A	2	7,65E-06	1,29E-04	0.567369	0.153166	0.279466	3.70429
42	Gasdermin	2	4,89E-07	5,55E-07	0.509846	0.212791	0.277363	2.39599
43	Cathepsin G	2	0	0	0.374105	0.355338	0.270557	1.05281
44	Alpha-actin-2^	2	2,71E-05	0,0036	0.395399	0.338083	0.266518	1.16953
45	Zymogen granule protein 16B	2	0	0	0.483322	0.254065	0.262613	1.90236
46	Lysozyme C	2	1,98E-05	1,26E-05	0.494749	0.243508	0.261743	2.03175
47	Mucin-7	2	0	0	0.393589	0.353884	0.252528	1.1122
48	Dermcidin	2	8,04E-06	4,93E-05	0.571743	0.191632	0.236624	2.98355
49	Salivary alpha-amylase^	2	4,97E-06	0	0.559759	0.240074	0.200166	2.33161
50	Muscle L-Lactate Dehydrogenase M Chain	2	0	3,84E-06	0.397666	0.4164	0.185934	0.955009
51	Protein S100-A7	2	0	0	0.403089	0.415858	0.181053	0.969295
52	chloride intracellular channel 4	2	0	8,92E-07	0.576554	0.2439	0.179546	2.36389
53	Prolactin-inducible protein	2	5,14E-06	0	0.559512	0.272157	0.168331	2.05584
54	Filaggrin	2	0	5,21E-06	0.483969	0.347737	0.168294	1.39177
55	enolase 1*	2	0	2,76E-08	0.620095	0.214473	0.165433	2.89125
56	Polyubiquitin-C	2	2,33E-06	2,01E-06	0.612533	0.228459	0.159008	2.68115
57	Bleomycin hydrolase	2	1,56E-06	6,68E-06	0.572582	0.314826	0.112592	1.81872
58	Desmocollin-3	2	0	6,34E-07	0.49797	0.405428	0.0966021	1.22826
59	tyr 3-/trp 5-monooxgenase activation protein	2	0	3,23E-07	0.621121	0.285087	0.0937918	2.17871
60	Glyceraldehyde-3-phosphate dehydrogenase*	2	2,16E-06	1,34E-04	0.466017	0.465041	0.0689421	1.0021
61	Serpin B4*	2	1,08E-06	3,80E-06	0.503517	0.430126	0.0663567	1.17063
62	H2A histone family, member O	2	1,50E-05	0	0.610692	0.324005	0.0653031	1.88482
63	Peroxiredoxin-1	2	0	7,85E-06	0.646853	0.323012	0.030134	2.00256
64	Aldolase A	2	0	9,17E-05	0.536075	0.453118	0.0108072	1.18308
65	Filamin-B	3	0	1,81E-05	0.123442	0.551654	0.324905	0.223767
66	Mesotrypsin	3	0	4,68E-05	0.184776	0.598161	0.217063	0.308906
67	Factor P	3	0	3,25E-04	0.128755	0.66643	0.204815	0.193201
68	Vitamin K-dependent protein S*	3	9,25E-05	0,0185	0.0312194	0.786488	0.182293	0.0396947
69	Thioredoxin	3	0	5,22E-06	0.215217	0.613898	0.170885	0.350574
70	14-3-3 sigma	3	1,71E-05	2,52E-05	0.181039	0.659118	0.159842	0.274669
71	Apolipoprotein E	3	8,11E-04	0,0010	0.0414852	0.821043	0.137472	0.0505274
72	junction plakoglobin	3	3,63E-05	4,05E-04	0.233926	0.633834	0.13224	0.369066
73	Corneodesmosin	3	0	5,26E-06	0.243191	0.627496	0.129313	0.387557
74	Histone H2B type F-S	3	1,11E-04	0	0.137323	0.788018	0.0746597	0.174263
75	Lipocalin-1	3	0	0	0.0619331	0.866787	0.07128	0.0714514
76	Actin-related protein 2/3 complex subunit 2^	3	0	6,68E-07	0.022643	0.915058	0.0622991	0.0247449
77	ras suppressor protein 1 isoform 1	3	0	3,97E-06	0.051696	0.89221	0.056094	0.0579415
78	Tropomyosin-3	3	0	1,42E-05	0.189787	0.779296	0.0309176	0.243536
79	Apolipoprotein D	4	4,61E-04	1,68E-06	0.104821	0.270669	0.62451	0.387266
80	Calmodulin-like 5	4	0	0	0.0575082	0.333671	0.60882	0.17235
81	Epidermal Fatty Acid Binding Protein	4	9,99E-08	8,75E-06	0.133765	0.269467	0.596767	0.496407
82	C9*	4	3,22E-06	1,25E-04	0.358238	0.0676942	0.574068	5.292
83	C5*	4	3,48E-04	0,0084	0.432107	0.0571159	0.510778	7.56543
84	Protein S100-A9	4	6,22E-06	3,74E-04	0.246864	0.254813	0.498323	0.968803
85	Neutrophil defensin 1	4	1,07E-06	9,74E-07	0.2158	0.286124	0.498077	0.754218
86	Serpin B3*	4	0	5,13E-06	0.380826	0.146334	0.472839	2.60244
87	peroxiredoxin 2 isoform a	4	0	5,17E-07	0.24611	0.284948	0.468942	0.8637
88	Cathepsin D	4	0	7,96E-06	0.288155	0.249127	0.462717	1.15666
89	Annexin A2p2	4	1,91E-05	0	0.434325	0.121678	0.443997	3.56946
90	C8a*	4	1,45E-05	7,94E-06	0.415541	0.153451	0.431008	2.70798
91	Cystatin S	4	2,24E-06	0	0.2142	0.35578	0.43002	0.602058
92	Glutamate dehydrogenase 1	4	1,04E-06	0	0.33021	0.24842	0.42137	1.32924
93	Protein S100-A8	4	1,50E-05	1,63E-04	0.316816	0.267565	0.41562	1.18407
94	Apolipoprotein C-I	4	1,24E-05	0	0.403312	0.196867	0.399821	2.04865
95	Mucin-5B	4	0	0	0.2535	0.352237	0.394264	0.719685
96	Annexin A2-i2	4	2,97E-06	4,38E-05	0.434054	0.219452	0.346494	1.9779
97	Triosephosphate Isomerase	4	0	5,97E-07	0.344326	0.327997	0.327676	1.04978
98	Peptidoglycan recognition protein	4	0	0	0.240328	0.439947	0.319725	0.546265
99	Skeletal Muscle Actin^	4	0	4,20E-04	0.266551	0.450931	0.282518	0.591113
100	Fibronectin*	4	8,34E-04	9,98E-04	0.271866	0.485907	0.242226	0.559502
101	Heat-shock protein beta-1	5	0	5,29E-06	0.575892	0.0140504	0.410057	40.9876
102	Serum paraoxonase/arylesterase 1	5	6,20E-04	0	0.552239	0.0895018	0.358259	6.17015
103	C1qb*	5	4,58E-04	1,34E-04	0.634728	0.0526175	0.312654	12.0631
104	C1qc*	5	9,29E-05	1,21E-04	0.69043	0.0642244	0.245346	10.7503
105	Eosinophil cationic protein	5	0	0	0.689998	0.117599	0.192403	5.86738
106	Myeloperoxidase	5	0	0	0.663505	0.1573	0.179195	4.21808
107	Complement factor H*	5	0,0043	0,0064	0.764874	0.0854704	0.149656	8.949
108	Zinc-alpha-2-glycoprotein	5	3,71E-04	5,63E-06	0.724453	0.174018	0.101529	4.16308
109	polymeric immunoglobulin receptor	5	0	0	0.811087	0.0933419	0.0955713	8.68942
110	Histon H1t	5	3,04E-06	0	0.689593	0.230412	0.0799951	2.99287
111	Procollagen C-proteinase	5	0	1,38E-05	0.879427	0.0409951	0.0795778	21.452
112	Desmoglein-1	5	0	2,17E-04	0.757188	0.165795	0.0770173	4.56701
113	Nucleosome Core Particle, Ncp146	5	0	0	0.814034	0.109528	0.0764385	7.43223
114	Fibrinogen alpha*	5	0,0059	0,0748	0.775524	0.150325	0.0741504	5.15897
115	HistoneH4	5	1,35E-04	2,79E-06	0.776441	0.155026	0.0685334	5.00846
116	Fibrinogen gamma*	5	0,0047	0,2190	0.83356	0.101276	0.065164	8.23061
117	Transglutaminase 3	5	8,80E-08	1,31E-06	0.857874	0.0778205	0.0643059	11.0238
118	Fibrinogen beta*	5	0,0054	0,1831	0.834846	0.120505	0.0446497	6.92791
119	C4b-binding protein beta*	5	3,41E-06	0,0031	0.879712	0.0887731	0.0315152	9.90967
120	C4b-binding protein alpha*	5	4,32E-04	0,1070	0.82828	0.149175	0.0225451	5.5524
121	Alpha-actinin-1^	5	0	4,49E-04	0.850937	0.127143	0.0219206	6.69277
122	Histone H2B 7	5	3,74E-05	0	0.888772	0.111228	1.27e-08	7.99053

## Sheet: S-table 5
S-Table 5. Data for the isolates from the throat and leg with plasma as reference. Table including standard deviations and p-values, significant (1) if p-valus<0.05
Protein	Leg	Throat	Plasma	stdLeg	stdThroat	stdPlasma	Kmean	p-val Leg/Throat	p-val Leg/Plasma	p-val Throat/Plasma	significant Leg/Throat (p<0.05)	significant Leg/Plasma (p<0.05)	significant Throat/Plasma (p<0.05)	Throat/Leg	Throat/Plasma	Leg/Plasma
a-2-macroglobulin	0.0933639	0.373936	0.5327	0.0097085	0.0141839	0.013433	2	0.0001554	0.0040404	0.0282828	1	1	1	4.00515	0.701964	0.175265
a-Enolase	0.190561	0.722957	0.0864818	0.00812315	0.0331231	0.00133806	5	0.0001554	0.0040404	0.0040404	1	1	1	3.79383	8.35964	2.20349
Adenylyl cyclase-associated protein 1	0.550539	0.444826	0.00463518	0.00550228	0.0091887	0.000268222	3	0.0018648	0.0040404	0.0040404	1	1	1	0.807982	95.9673	118.774
Apolipoprotein A-I	0.168709	0.325581	0.50571	0.0082908	0.00688201	0.0228825	2	0.0001554	0.0040404	0.00808081	1	1	1	1.92983	0.643809	0.333609
Apolipoprotein C-I	0.245811	0.740651	0.0135371	0.0253242	0.0486124	0.000914473	5	0.0104118	0.0040404	0.0040404	1	1	1	3.01309	54.7128	18.1584
C-factor-B	0.574649	0.285129	0.140222	0.0304869	0.0092194	0.00194824	1	0.0010878	0.0040404	0.0040404	1	1	1	0.496179	2.03341	4.09813
C-factor-H	0.0834341	0.62689	0.289676	0.0147765	0.0259011	0.0104633	5	0.0001554	0.0282828	0.00808081	1	1	1	7.5136	2.16411	0.288026
C1qB	0.0483997	0.753282	0.198318	0.0041201	0.0307276	0.00560153	5	0.0001554	0.0040404	0.0040404	1	1	1	15.5638	3.79835	0.24405
C1qC	0.0712009	0.76715	0.161649	0.00422115	0.0221597	0.00427913	5	0.0001554	0.0040404	0.0040404	1	1	1	10.7744	4.74578	0.440466
C5	0.33185	0.664914	0.00323549	0.0126133	0.021596	0.000183652	4	0.000621601	0.0040404	0.0040404	1	1	1	2.00366	205.506	102.566
C6	0.332936	0.663463	0.00360131	0.00877378	0.0234427	8.9126e-05	4	0.0003108	0.0040404	0.0040404	1	1	1	1.99277	184.228	92.4486
C7	0.344835	0.652419	0.00274577	0.0104922	0.0146657	9.59786e-05	4	0.0003108	0.0040404	0.0040404	1	1	1	1.89197	237.609	125.588
C8b	0.361471	0.632031	0.00649819	0.0108112	0.0215006	0.000509456	4	0.0010878	0.0040404	0.0040404	1	1	1	1.7485	97.2625	55.6264
C8g	0.366054	0.629608	0.0043381	0.0196585	0.0122121	0.000189719	4	0.0018648	0.0040404	0.0040404	1	1	1	1.71999	145.134	84.3811
C9	0.329827	0.666929	0.00324403	0.011329	0.0173971	0.000222029	4	0.0003108	0.0040404	0.0040404	1	1	1	2.02205	205.586	101.672
Catalase	0.185618	0.421164	0.393218	0.00346919	0.0217821	0.00227329	4	0.0001554	0.0040404	1	1	1	0	2.26898	1.07107	0.472049
cytosolic malate dehydrogenase	0.822885	0.146022	0.0310929	0.0854494	0.0107792	0.0017359	1	0.014763	0.0040404	0.0040404	1	1	1	0.177451	4.69629	26.4653
Dermcidin	0.246494	0.674548	0.0789576	0.00924562	0.0295371	0.0136528	5	0.0104118	0.0484848	0.00808081	1	1	1	2.73657	8.54317	3.12185
Fibrinogen a	0.174068	0.786516	0.039416	0.00418907	0.0172677	0.000583829	5	0.0001554	0.0040404	0.0040404	1	1	1	4.51843	19.9542	4.41618
Fibrinogen b	0.191426	0.783533	0.0250418	0.00472505	0.0192413	0.000398119	5	0.0001554	0.0040404	0.0040404	1	1	1	4.09314	31.289	7.64425
Fibrinogen g	0.16881	0.803041	0.0281487	0.00409257	0.0298977	0.000478016	5	0.0001554	0.0040404	0.0040404	1	1	1	4.75707	28.5286	5.99708
Hemoglobin a	0.692197	0.254211	0.0535921	0.0135288	0.00927356	0.00133562	1	0.0001554	0.0040404	0.0040404	1	1	1	0.367253	4.74345	12.916
Hemoglobin b	0.716138	0.205346	0.0785156	0.0172649	0.0110504	0.000974406	1	0.0001554	0.0040404	0.0040404	1	1	1	0.286741	2.61536	9.12097
Histidine-rich glycoprotein	0.0526674	0.0952058	0.852127	0.00463151	0.00867762	0.0421541	2	0.0379176	0.0040404	0.0040404	1	1	1	1.80768	0.111727	0.061807
Histone H2B 7	0.257884	0.578616	0.1635	0.0288477	0.048293	0.00675017	4	0.0379176	0.933333	0.0161616	1	0	1	2.2437	3.53893	1.57727
Lactotransferrin	0.327575	0.603317	0.0691074	0.023933	0.0215544	0.0050167	4	0.0104118	0.0040404	0.0040404	1	1	1	1.84177	8.73014	4.74009
LIM and senescent cell antigen-like-containing domain protein 1	0.569338	0.424937	0.00572502	0.00810048	0.0161202	0.000537481	3	0.014763	0.0040404	0.0040404	1	1	1	0.746369	74.2245	99.4474
Lysozyme C	0.240532	0.501823	0.257645	0.0252399	0.0357748	0.0151248	4	0.00699301	0.460606	0.0282828	1	0	1	2.0863	1.94773	0.933581
Mucin-7	0.313105	0.592872	0.0940232	0.0223722	0.00713976	0.0034845	4	0.0001554	0.0040404	0.0040404	1	1	1	1.89352	6.30559	3.33008
Myosin	0.419479	0.575373	0.00514793	0.00551027	0.00757592	0.00046197	4	0.0001554	0.0040404	0.0040404	1	1	1	1.37164	111.768	81.485
Serpin B12	0.0343425	0.204856	0.760802	0.00169872	0.0137361	0.00762646	2	0.0001554	0.0040404	0.0040404	1	1	1	5.96508	0.269263	0.0451398
Serum albumin	0.0342849	0.252029	0.713687	0.00157218	0.00997678	0.0174651	2	0.0001554	0.0040404	0.0040404	1	1	1	7.35101	0.353136	0.0480391
Serum paraoxonase/arylesterase 1	0.200877	0.671419	0.127703	0.0246269	0.0380568	0.00345897	5	0.004662	0.682828	0.0040404	1	0	1	3.34244	5.25765	1.573
Stefin	0.457721	0.443382	0.0988965	0.0788406	0.0111958	0.00386461	3	0.0104118	0.00808081	0.0040404	1	1	1	0.968673	4.48329	4.62829
Thrombospondin-1	0.556049	0.43402	0.00993097	0.00823328	0.00821168	0.000714329	3	0.004662	0.0040404	0.0040404	1	1	1	0.780543	43.7037	55.9914
Tropomyosin-3	0.534352	0.462081	0.00356736	0.00757326	0.00559047	0.000408438	3	0.014763	0.0040404	0.0040404	1	1	1	0.864751	129.53	149.789
14-3-3 sigma	0.455769	0.54222	0.00201121	0.0309858	0.0103894	0.000187572	3	1	0.0040404	0.0040404	0	1	1	1.18968	269.599	226.614
a-1-antitrypsin	0.13508	0.0996065	0.765313	0.0235126	0.0122577	0.0270407	2	1	0.0040404	0.0040404	0	1	1	0.737387	0.130151	0.176503
a-Actin-2	0.492972	0.505116	0.00191269	0.0080398	0.0176245	3.78046e-05	3	1	0.0040404	0.0040404	0	1	1	1.02463	264.087	257.738
a-actinin-1	0.49982	0.491042	0.00913784	0.0208995	0.00681499	0.000445152	3	0.798446	0.0040404	0.0040404	0	1	1	0.982436	53.7372	54.6979
Actin-related protein 2/3 complex subunit 2	0.885914	0.0949927	0.0190932	0.185626	0.0226053	0.000580635	1	0.424398	0.193939	0.0161616	0	0	1	0.107226	4.9752	46.3993
Affixin	0.48038	0.423542	0.0960777	0.0317464	0.0183688	0.00682026	3	0.798446	0.0040404	0.0040404	0	1	1	0.88168	4.40833	4.99992
Aldolase A	0.593445	0.394794	0.0117607	0.0253457	0.00937224	0.000863725	3	0.0829837	0.0040404	0.0040404	0	1	1	0.665259	33.569	50.4601
Apolipoprotein A-II	0.0758013	0.094139	0.83006	0.00482004	0.0076845	0.0209704	2	0.441803	0.0040404	0.0040404	0	1	1	1.24192	0.113412	0.0913203
Apolipoprotein A-IV	0.334469	0.397035	0.268496	0.00877081	0.00750634	0.00729369	4	0.0829837	0.109091	0.00808081	0	0	1	1.18706	1.47874	1.24571
Apolipoprotein C-III	0.154112	0.166778	0.67911	0.00986724	0.0123533	0.0117833	2	0.798446	0.0040404	0.0040404	0	1	1	1.08219	0.245584	0.226932
Apolipoprotein D	0.479491	0.469878	0.0506308	0.0503565	0.0526091	0.00101386	3	0.441803	0.0040404	0.0040404	0	1	1	0.979953	9.28049	9.47035
Apolipoprotein E	0.413539	0.469635	0.116825	0.0150599	0.0461397	0.0015122	3	0.878477	0.0040404	0.214141	0	1	0	1.13565	4.01998	3.53981
Apolipoprotein H	0.174159	0.173193	0.652648	0.0137996	0.0199533	0.0326841	2	1	0.0040404	0.0040404	0	1	1	0.994451	0.265369	0.26685
Azurocidin	0.364314	0.543824	0.0918628	0.0303297	0.0274211	0.00682708	4	0.160528	0.0484848	0.0040404	0	1	1	1.49273	5.91996	3.96585
Bleomycin hydrolase	0.442182	0.46992	0.087898	0.0314645	0.0370462	0.00439782	3	0.878477	0.0040404	0.00808081	0	1	1	1.06273	5.34619	5.03063
Bone morphogenetic protein 1	0.231196	0.723901	0.0449031	0.030295	0.0958105	0.00393148	5	0.130381	0.569697	0.569697	0	0	0	3.13112	16.1214	5.14877
C1r	0.338632	0.570313	0.0910543	0.0456196	0.0248525	0.00522756	4	0.234499	1	0.0040404	0	0	1	1.68417	6.26344	3.71902
C1s	0.297595	0.488958	0.213447	0.0380232	0.0275962	0.0130363	4	0.160528	1	0.0484848	0	0	1	1.64303	2.29077	1.39423
C3	0.635353	0.349446	0.0152015	0.0837667	0.0190559	0.000224479	1	1	0.0040404	0.0040404	0	1	1	0.550003	22.9877	41.7955
C4b-bp a	0.253406	0.189936	0.556658	0.0243402	0.0218416	0.0224713	2	0.441803	0.0161616	0.0040404	0	1	1	0.74953	0.341207	0.455228
C4b-bp b	0.216404	0.159767	0.62383	0.0263693	0.0206238	0.0305025	2	0.932867	0.0040404	0.0040404	0	1	1	0.738281	0.256106	0.346895
C4b	0.447922	0.477104	0.0749736	0.0600392	0.0320999	0.00180112	3	0.878477	1	0.0040404	0	0	1	1.06515	6.36363	5.9744
C8a	0.218515	0.742701	0.0387838	0.0296319	0.14816	0.00422175	5	0.278632	0.49697	0.282828	0	0	0	3.39885	19.1498	5.63419
Calmodulin-like protein 5	0.25826	0.4214	0.320341	0.0201284	0.0550849	0.0244757	4	0.798446	0.682828	0.933333	0	0	0	1.63169	1.31547	0.806202
CapZ b	0.481462	0.439747	0.0787904	0.00839424	0.0145727	0.00291917	3	0.505361	0.0040404	0.0040404	0	1	1	0.913357	5.58123	6.11068
Caspase-14	0.240969	0.215415	0.543615	0.0291414	0.00977168	0.0684654	2	0.95913	0.282828	0.214141	0	0	0	0.893954	0.396264	0.443271
Catalase	0.52856	0.422558	0.048882	0.0176013	0.0196384	0.00391161	3	0.160528	0.0040404	0.0040404	0	1	1	0.79945	8.64444	10.813
Cathepsin G	0.518341	0.454722	0.0269365	0.0550579	0.0350747	0.00556342	3	0.95913	0.0040404	0.0040404	0	1	1	0.877264	16.8813	19.2431
Cathrpsin D	0.490031	0.451808	0.0581603	0.0680187	0.0610316	0.000945944	3	0.645377	1	1	0	0	0	0.921999	7.76833	8.42553
Cl intracellular channel 1	0.572562	0.416198	0.01124	0.0226646	0.0160727	0.000904449	3	0.0829837	0.0040404	0.0040404	0	1	1	0.726904	37.0282	50.9396
Cl intracellular channel 4	0.0805877	0.241056	0.678356	0.0115714	0.0360416	0.0124305	2	0.0829837	0.0040404	0.0040404	0	1	1	2.99123	0.355354	0.118799
Clusterin	0.461389	0.447076	0.0915345	0.00918814	0.0090475	0.00164548	3	0.720901	0.0040404	0.0040404	0	1	1	0.968979	4.88424	5.0406
Coagulation factor XIII	0.533307	0.446416	0.0202772	0.0153684	0.0114683	0.000399514	3	0.234499	0.0040404	0.0040404	0	1	1	0.837072	22.0156	26.3007
Corneodesmosin	0.226673	0.679887	0.0934401	0.0199813	0.199474	0.00745112	5	0.95913	0.460606	0.153535	0	0	0	2.99942	7.27617	2.42586
Cystatin S	0.104017	0.621557	0.274426	0.0066419	0.0948129	0.0111798	5	0.328205	0.0040404	1	0	1	0	5.97555	2.26493	0.379033
Cysteine-rich secretory protein 3	0.260224	0.383205	0.356571	0.0224225	0.0234985	0.0114459	4	0.104895	0.214141	0.933333	0	0	0	1.4726	1.0747	0.729795
Desmogelin-1	0.301575	0.624891	0.0735338	0.0253186	0.0639428	0.00433194	4	0.104895	0.0040404	0.0040404	0	1	1	2.07209	8.49801	4.10117
Elongationfactor 1-?	0.271761	0.267512	0.460727	0.0279853	0.0433996	0.0445578	2	0.573737	0.153535	0.214141	0	0	0	0.984366	0.580631	0.589853
Enolase 1	0.499585	0.472091	0.0283243	0.0127375	0.0172992	0.000861601	3	0.645377	0.0040404	0.0040404	0	1	1	0.944966	16.6674	17.638
Epidermal Fatty Acid Binding Protein	0.470127	0.476813	0.05306	0.0330235	0.0145276	0.00165144	3	0.95913	0.0040404	0.0040404	0	1	1	1.01422	8.98629	8.86029
Fibronectin	0.371431	0.425482	0.203086	0.120015	0.0479926	0.00538269	4	0.160528	0.0484848	0.214141	0	1	0	1.14552	2.09508	1.82893
Filaggrin 2	0.0502478	0.168229	0.781523	0.00725249	0.0409837	0.0249376	2	0.130381	0.0040404	0.0040404	0	1	1	3.34799	0.215258	0.0642947
Filaggrin	0.51013	0.290853	0.199016	0.0469965	0.0106156	0.00809564	3	0.505361	0.153535	0.0727273	0	0	0	0.570155	1.46145	2.56326
Filamin-A-a	0.463016	0.493283	0.043701	0.0213113	0.00274657	0.00601431	3	0.382284	0.0040404	0.0040404	0	1	1	1.06537	11.2877	10.5951
Filamin-B	0.410069	0.493993	0.0959377	0.0658542	0.0713308	0.00626072	4	0.720901	0.282828	0.153535	0	0	0	1.20466	5.1491	4.27433
Gasdermin	0.39935	0.314164	0.286487	0.0449563	0.0307394	0.0459719	3	1	0.80404	0.460606	0	0	0	0.786688	1.09661	1.39395
Gelsolin	0.426465	0.344633	0.228902	0.0134031	0.0148794	0.00458918	3	0.130381	0.0040404	0.0484848	0	1	1	0.808116	1.50559	1.86309
Glutamate dehydrogenase 1	0.48955	0.182445	0.328005	0.085478	0.0172187	0.0738563	1	0.505361	0.682828	0.808081	0	0	0	0.372678	0.556224	1.49251
Glutathione Transferase	0.489906	0.509051	0.00104225	0.0105047	0.0124947	8.6486e-05	3	0.573737	0.0040404	0.0040404	0	1	1	1.03908	488.417	470.048
Glyceraldehyde-3-phosphate dehydrogenase	0.528384	0.453859	0.0177578	0.0309812	0.0318896	0.000936676	3	0.505361	0.0040404	0.0040404	0	1	1	0.858957	25.5583	29.7551
Glycoprotein 340	0.328727	0.489024	0.182249	0.0453367	0.0660169	0.00587484	4	0.234499	1	1	0	0	0	1.48763	2.68328	1.80373
Haptoglobin	0.0247775	0.0241766	0.951046	0.00393194	0.00097683	0.0392918	2	0.160528	0.0040404	0.0040404	0	1	1	0.97575	0.0254211	0.0260529
Heart Lactate Dehydrogenase	0.500652	0.490524	0.00882418	0.0138707	0.0310344	0.000484424	3	0.878477	0.0040404	0.0040404	0	1	1	0.979769	55.5886	56.7364
Heat-shock protein beta-1	0.397483	0.378001	0.224516	0.0255964	0.0322414	0.0101826	3	0.95913	0.153535	0.282828	0	0	0	0.950987	1.68363	1.7704
Histon 2A family member O	0.481335	0.409602	0.109063	0.0294111	0.0330957	0.00243953	3	0.798446	0.0484848	0.0040404	0	1	1	0.850971	3.75564	4.41336
Inter-? globulin inhibitor H4	0.0844069	0.0953359	0.820257	0.017765	0.0125423	0.0316457	2	0.505361	0.0040404	0.0040404	0	1	1	1.12948	0.116227	0.102903
junction plakoglobin	0.461319	0.394471	0.14421	0.0169246	0.0194113	0.00426165	3	0.328205	0.0040404	0.0040404	0	1	1	0.855093	2.7354	3.19894
Kindlin-3	0.52722	0.471589	0.00119057	0.0194358	0.0098714	8.13254e-05	3	0.505361	0.0040404	0.0040404	0	1	1	0.894483	396.103	442.829
Late envelope protein 7	0.526603	0.401241	0.072156	0.0333499	0.0249139	0.00200116	3	0.328205	0.0040404	0.0282828	0	1	1	0.761943	5.56075	7.29811
Lipocalin-1	0.239554	0.642251	0.118195	0.019034	0.124965	0.0167856	5	0.278632	0.214141	0.0484848	0	0	1	2.68103	5.43382	2.02677
Metalloproteinase inhibitor 1	0.392747	0.573738	0.0335148	0.0449459	0.0659714	0.00131585	4	0.382284	0.0040404	0.0040404	0	1	1	1.46083	17.1189	11.7186
Muscle Lactate Dehydrogenase	0.479222	0.424482	0.0962963	0.020226	0.0146942	0.00135117	3	0.505361	0.0040404	0.0040404	0	1	1	0.885774	4.40809	4.97653
Myeloperoxidase	0.293039	0.54154	0.165421	0.0463151	0.0487368	0.00483473	4	0.130381	0.808081	0.109091	0	0	0	1.84801	3.2737	1.77147
Neutrophil defensin 1	0.494589	0.31833	0.187081	0.0629821	0.0374603	0.0151551	3	0.441803	0.214141	0.682828	0	0	0	0.643626	1.70157	2.64372
Neutrophil elastase	0.19626	0.776074	0.0276665	0.0209204	0.0935706	0.00190877	5	0.104895	0.0323232	0.0040404	0	1	1	3.95432	28.0511	7.09378
Nucleosome Core Particle	0.377889	0.577325	0.0447855	0.0407455	0.0641338	0.00442947	4	0.441803	0.0484848	0.0040404	0	1	1	1.52776	12.8909	8.43777
Peptidoglycan recognition protein	0.354549	0.522806	0.122645	0.00853204	0.038878	0.010713	4	0.382284	0.0040404	0.0282828	0	1	1	1.47457	4.26277	2.89086
peroxiredoxin 2	0.0407588	0.0397749	0.919466	0.00284719	0.00509847	0.142672	2	0.645377	0.214141	0.214141	0	0	0	0.97586	0.0432586	0.0443287
Peroxiredoxin-1	0.573295	0.407487	0.0192184	0.0680402	0.0210133	0.00142942	3	0.878477	0.00808081	0.0040404	0	1	1	0.710781	21.203	29.8305
Plasminogen	0.136362	0.139156	0.724482	0.0067839	0.00621165	0.0329158	2	0.878477	0.0040404	0.0040404	0	1	1	1.02049	0.192077	0.18822
Polyubiquitin-C	0.283376	0.562554	0.15407	0.0210423	0.0653358	0.0154288	4	0.160528	0.109091	0.109091	0	0	0	1.98518	3.65129	1.83927
Prolactin-inducible protein	0.482709	0.451296	0.0659951	0.0359822	0.0185737	0.00675581	3	0.441803	0.0484848	0.0040404	0	1	1	0.934925	6.83834	7.31431
Protein S100-A7	0.333198	0.58069	0.0861119	0.019474	0.114734	0.0118688	4	0.878477	0.0282828	0.0282828	0	1	1	1.74277	6.74343	3.86937
Protein S100-A8	0.195159	0.120717	0.684124	0.0285652	0.00830466	0.0215279	2	0.95913	0.0040404	0.0040404	0	1	1	0.618554	0.176454	0.285269
Protein S100-A9	0.439329	0.503913	0.0567584	0.0577773	0.0619248	0.00276575	3	0.505361	0.282828	0.0484848	0	0	1	1.14701	8.87821	7.74032
Ras suppressor protein 1	0.504888	0.391643	0.10347	0.0209885	0.029918	0.00217699	3	0.382284	0.0040404	0.214141	0	1	0	0.775702	3.7851	4.87958
Ras-related protein Rap-1b	0.538895	0.459103	0.0020016	0.0171629	0.0493979	0.000208372	3	0.798446	0.0040404	0.0040404	0	1	1	0.851934	229.368	269.232
Ribonuclease 3	0.556961	0.413249	0.0297904	0.0660272	0.0274525	0.00383059	3	0.878477	0.0484848	0.0040404	0	1	1	0.74197	13.8719	18.696
Salivary a-amylase	0.568691	0.426089	0.00521977	0.096417	0.0926409	0.000453773	3	0.878477	0.00808081	0.0040404	0	1	1	0.749245	81.6299	108.95
Secreted phosphoprotein 24	0.421128	0.573735	0.00513729	0.0115903	0.0383097	0.00024457	4	0.160528	0.0040404	0.0040404	0	1	1	1.36238	111.68	81.9747
Serotransferrin	0.0140044	0.0188586	0.967137	0.000833206	0.0019817	0.054126	2	0.441803	0.0040404	0.0040404	0	1	1	1.34662	0.0194994	0.0144803
Serpin B1	0.436507	0.537366	0.0261266	0.019444	0.0134668	0.00231373	3	0.160528	0.0040404	0.0040404	0	1	1	1.23106	20.5677	16.7074
Serpin B3	0.312808	0.252939	0.434253	0.0387521	0.0212807	0.0577301	2	0.720901	0.969697	0.933333	0	0	0	0.808608	0.58247	0.720337
Serpin B4	0.388767	0.426159	0.185074	0.0259002	0.0306937	0.0173871	3	0.645377	0.109091	0.0282828	0	0	1	1.09618	2.30264	2.10061
Skeletal Muscle Actin	0.528474	0.467339	0.00418678	0.011646	0.0140486	4.27759e-05	3	0.234499	0.0040404	0.0040404	0	1	1	0.884318	111.623	126.224
Superoxide dismutase	0.378107	0.503223	0.11867	0.0305084	0.0497369	0.00409904	4	0.645377	0.0161616	0.153535	0	1	0	1.3309	4.24052	3.18621
Talin-1	0.48333	0.516284	0.00038608	0.0141634	0.00884576	1.40602e-05	3	0.505361	0.0040404	0.0040404	0	1	1	1.06818	1337.24	1251.89
Thioredoxin	0.326203	0.546732	0.127065	0.025125	0.0322634	0.00368314	4	0.104895	0.0282828	0.0040404	0	1	1	1.67605	4.30276	2.5672
Transglutaminase 3	0.176922	0.777627	0.0454515	0.0206687	0.0990551	0.00131178	5	0.160528	0.569697	0.109091	0	0	0	4.39532	17.1089	3.89253
Triosephosphate Isomerase	0.531995	0.447568	0.0204365	0.0195441	0.0222909	0.00291895	3	0.278632	0.0040404	0.0040404	0	1	1	0.841302	21.9004	26.0316
tyr-3-/trp-5-monooxgenase activation protein g	0.282674	0.706975	0.0103515	0.037418	0.0992628	0.000334115	5	0.104895	0.0282828	0.0040404	0	1	1	2.50103	68.2969	27.3076
Vinculin	0.517228	0.333345	0.149427	0.0348509	0.0574267	0.00224321	3	0.104895	0.0040404	0.214141	0	1	0	0.644483	2.23082	3.46142
Vitamin K-dependent protein S	0.254002	0.286954	0.459044	0.00192531	0.00670703	0.0118553	2	0.0649573	0.0040404	0.0040404	0	1	1	1.12973	0.625112	0.553327
Vitronectin	0.389622	0.575737	0.0346408	0.0098249	0.0276946	0.000597019	4	0.194872	0.0040404	0.0040404	0	1	1	1.47768	16.6202	11.2475
Zinc-a-2-glycoprotein	0.205703	0.273852	0.520445	0.0210803	0.0297177	0.00886149	2	0.573737	0.0040404	0.0484848	0	1	1	1.3313	0.526188	0.395243
Zymogen granule protein 16	0.325903	0.593463	0.0806342	0.0487788	0.0990383	0.00984129	4	0.441803	0.10101	0.0242424	0	0	1	1.82098	7.35994	4.04175
