# Supplementary material for: A comprehensive analysis of the Streptococcus pyogenes and human plasma protein interaction network
Source: Royal Society of Chemistry journal article supplement (doi:10.1039/c3mb70555b), 2014-01-28
Supplement: c3mb70555b_2.pdf [file c3mb70555b_2.pdf]

## S-Figure 1

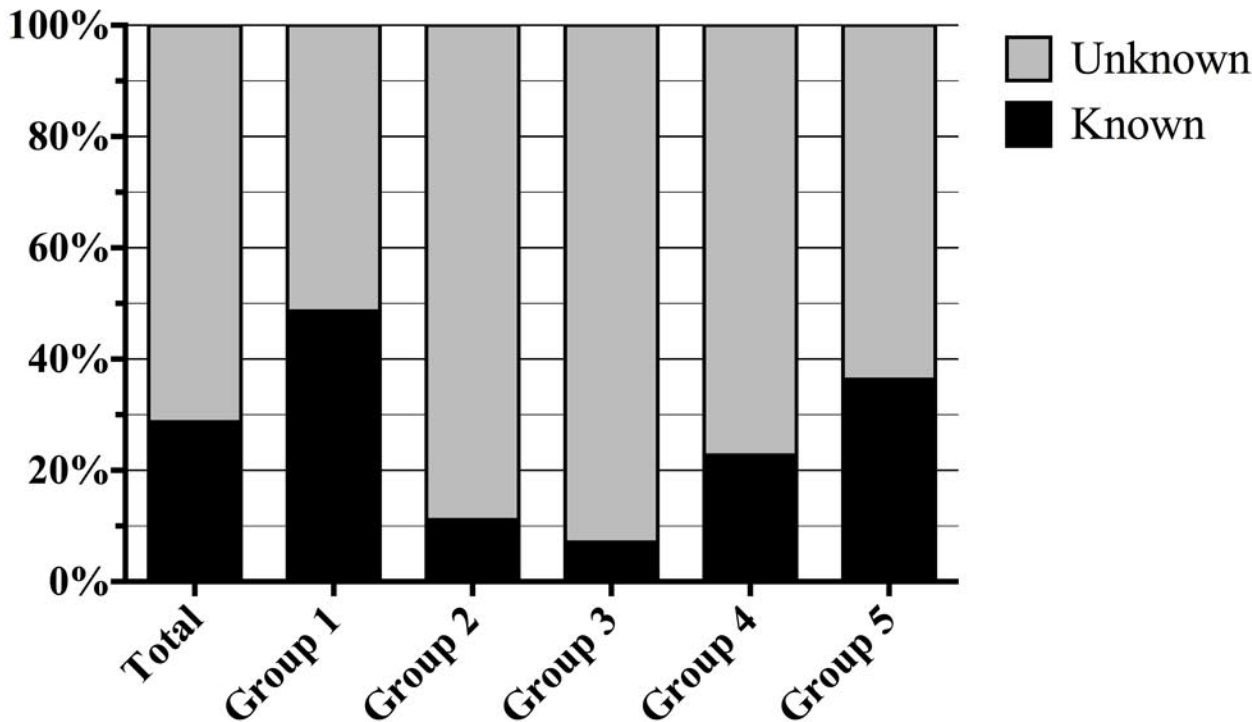

**S-Figure 1. Proteins with previously known (blue) or unknown (red) interaction with the streptococcal surface, from literature. Groups defined in Figure 2 and total contains all groups. Proteins marked with \* in S-table 4 have previously known interaction with *S. pyogenes* surface.**

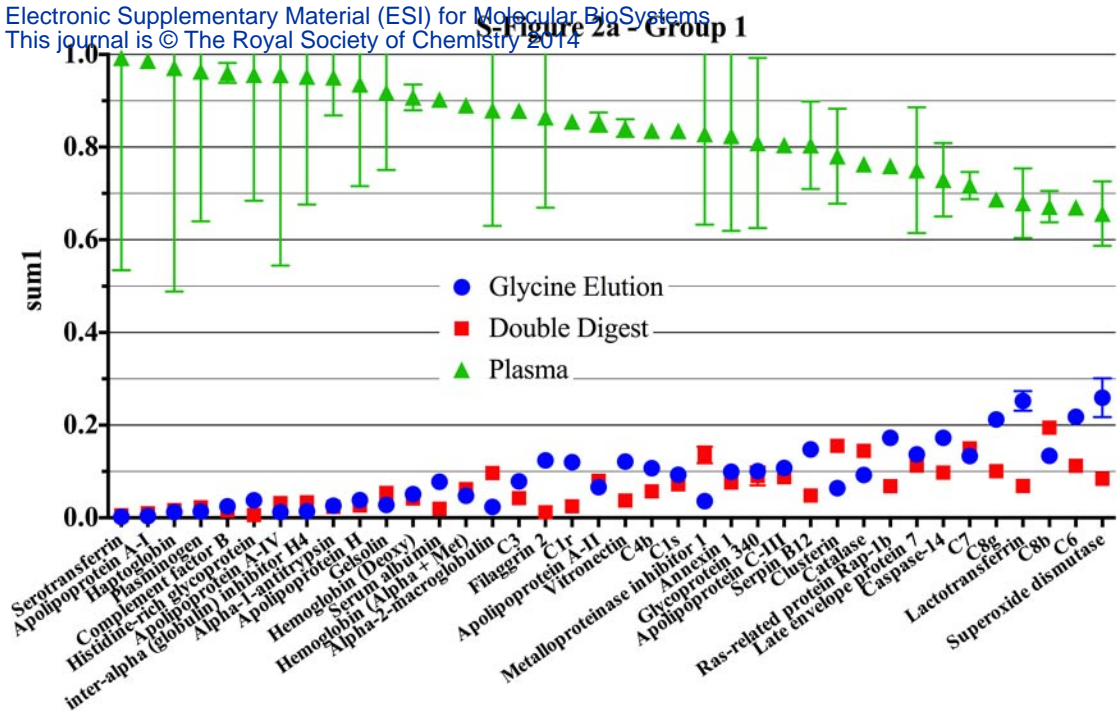

**S-Figure 2a. Enlargement of Figure 2, with only group 1 and name for the proteins within the group**

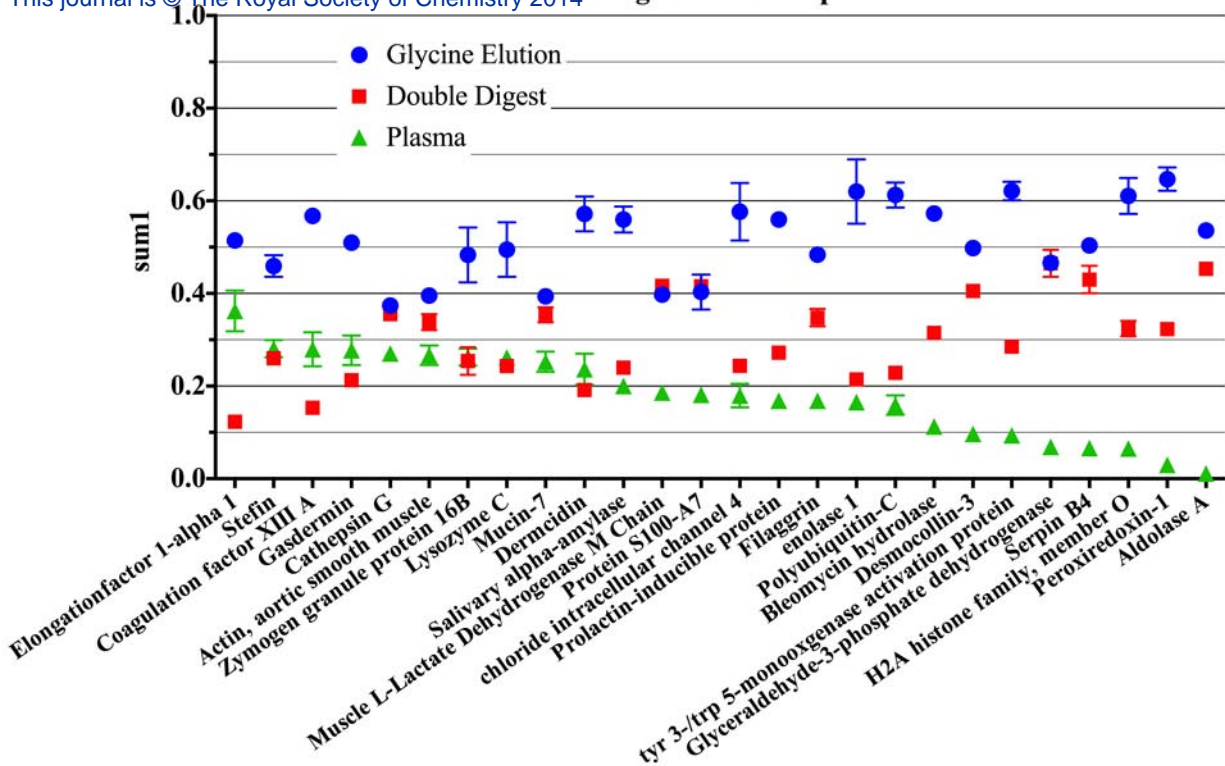

S-Figure 2b. Enlargement of Figure 2, with only group 2 and name for the proteins within the group

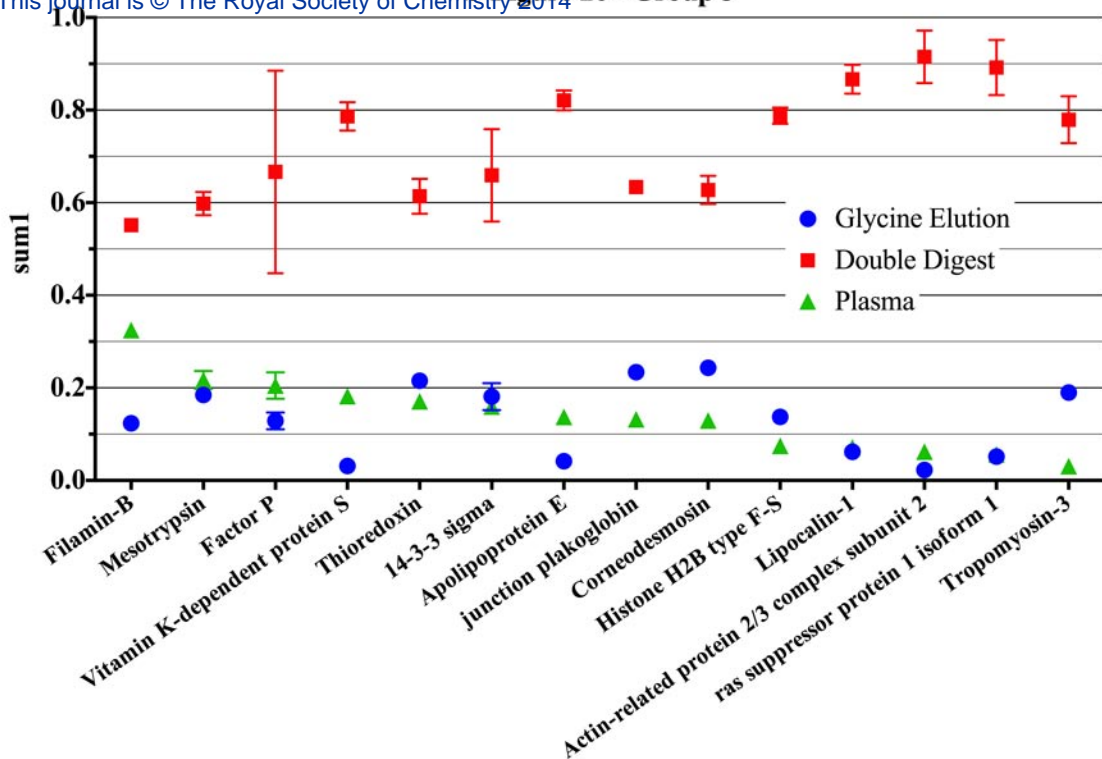

**S-Figure 2c. Enlargement of Figure 2, with only group 3 and name for the proteins within the group**



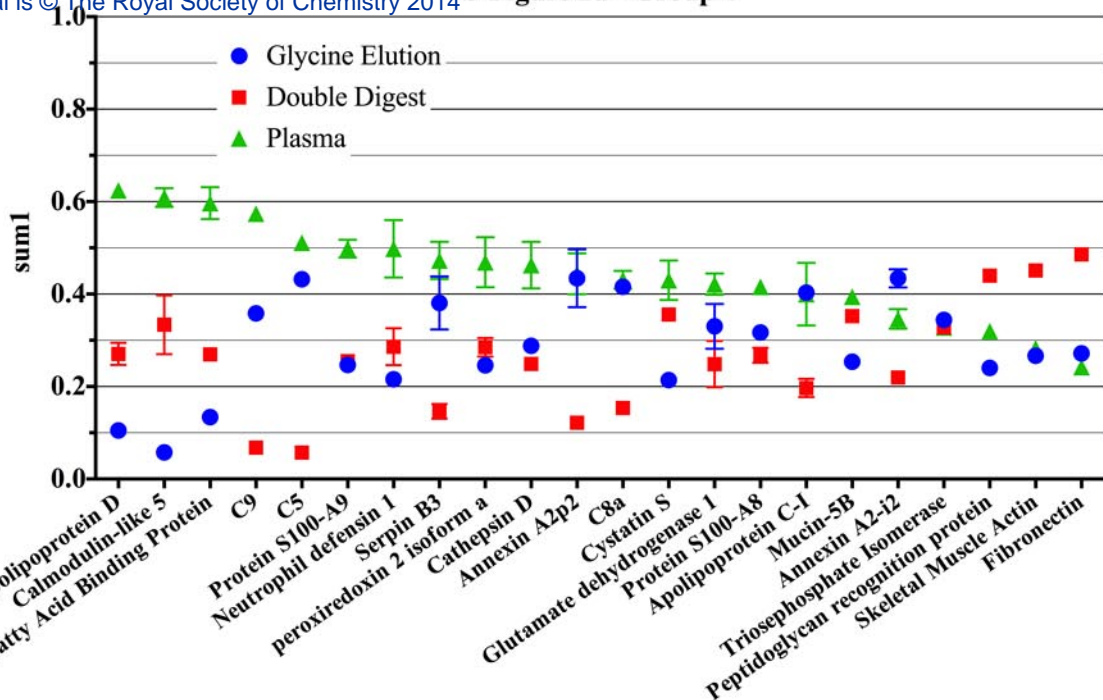

**S-Figure 2d. Enlargement of Figure 2, with only group 4 and name for the proteins within the group**

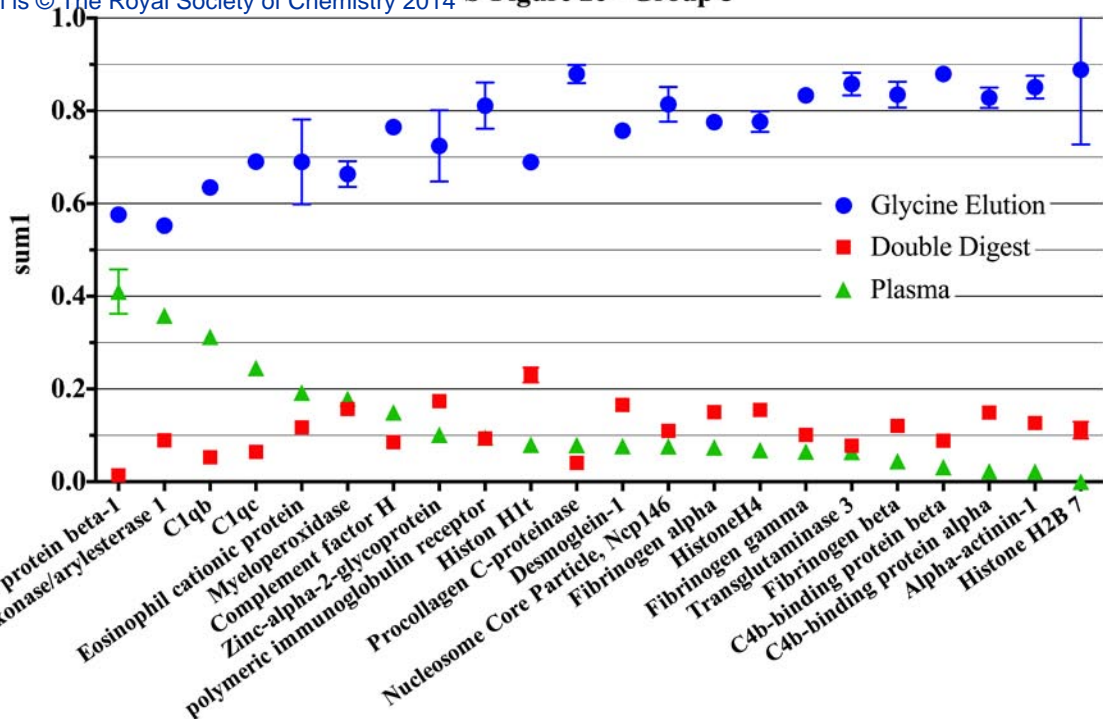

**S-Figure 2e. Enlargement of Figure 2, with only group 5 and name for the proteins within the group**

Electronic Supplementary Material (ESI) for Molecular  
BioSystems

This journal is © The Royal Society of Chemistry 2014

S-Figure 3

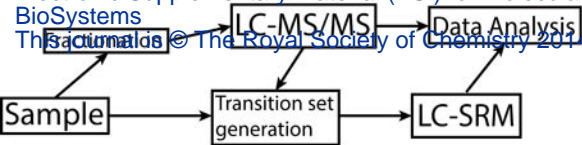

Schematic figure for the analysis of bacterial interaction protein, 2 different MS methods are used.
